# Supplementary material for: Image Processing-Based Recognition of Wall Defects Using Machine Learning Approaches and Steerable Filters
Source: Comput Intell Neurosci. 2018 Nov 15;2018:7913952. doi: 10.1155/2018/7913952 (PMC6276531; doi:10.1155/2018/7913952)
Supplement: Supplementary Materials — The supplementary file contains the data set used in this study. In this file, the first 500 columns are the input features (X1 to X40) of the data (which are the smoothed projection integrals); the last column is the class labels (1 = longitudinal crack, 2 = transverse crack, 3 = diagonal crack, 4 = spall damage, and 5 = intact wall). [file 7913952.f1.csv]

X1	X2	X3	X4	X5	X6	X7	X8	X9	X10	X11	X12	X13	X14	X15	X16	X17	X18	X19	X20	X21	X22	X23	X24	X25	X26	X27	X28	X29	X30	X31	X32	X33	X34	X35	X36	X37	X38	X39	X40	Y
0.451	0.447	0.475	0.494	0.445	0.48	0.469	0.487	0.504	0.529	0.39	0.452	0.706	0.664	0.355	0.387	0.454	0.43	0.5	0.435	0.05	0.188	0.248	0.314	0.425	0.446	0.337	0.227	0.12	0.039	0.03	0.151	0.243	0.336	0.463	0.422	0.315	0.225	0.153	0.053	1
0.445	0.438	0.423	0.514	0.498	0.499	0.49	0.499	0.472	0.473	0.478	0.402	0.41	0.409	0.442	0.583	0.661	0.582	0.391	0.389	0.046	0.135	0.221	0.33	0.444	0.456	0.364	0.222	0.122	0.04	0.038	0.134	0.221	0.351	0.396	0.412	0.383	0.267	0.144	0.036	1
0.449	0.453	0.441	0.467	0.484	0.46	0.526	0.619	0.527	0.49	0.442	0.441	0.701	0.693	0.503	0.398	0.446	0.415	0.441	0.425	0.045	0.184	0.282	0.382	0.452	0.437	0.315	0.191	0.127	0.045	0.046	0.144	0.232	0.349	0.458	0.467	0.354	0.229	0.147	0.034	1
0.465	0.462	0.443	0.484	0.45	0.474	0.489	0.468	0.599	0.571	0.439	0.453	0.45	0.458	0.438	0.498	0.862	0.489	0.421	0.415	0.04	0.146	0.246	0.357	0.47	0.463	0.343	0.233	0.126	0.039	0.038	0.145	0.223	0.341	0.406	0.407	0.385	0.295	0.168	0.054	1
0.517	0.504	0.454	0.5	0.483	0.465	0.448	0.504	0.442	0.499	0.423	0.787	0.567	0.446	0.49	0.413	0.412	0.424	0.434	0.41	0.054	0.164	0.264	0.341	0.455	0.426	0.318	0.23	0.119	0.04	0.059	0.183	0.28	0.351	0.433	0.431	0.31	0.186	0.129	0.052	1
0.524	0.473	0.468	0.453	0.444	0.485	0.478	0.501	0.476	0.478	0.456	0.422	0.443	0.43	0.418	0.416	0.477	0.876	0.464	0.391	0.037	0.141	0.202	0.313	0.451	0.46	0.338	0.244	0.172	0.04	0.049	0.123	0.216	0.357	0.456	0.401	0.315	0.253	0.176	0.057	1
0.496	0.473	0.479	0.459	0.51	0.441	0.481	0.46	0.493	0.462	0.45	0.461	0.829	0.445	0.474	0.43	0.403	0.406	0.418	0.439	0.042	0.167	0.278	0.333	0.439	0.423	0.319	0.19	0.149	0.045	0.045	0.168	0.256	0.357	0.449	0.428	0.3	0.213	0.119	0.045	1
0.492	0.456	0.452	0.459	0.48	0.471	0.535	0.478	0.47	0.491	0.418	0.411	0.43	0.441	0.416	0.603	0.73	0.441	0.496	0.409	0.046	0.125	0.226	0.364	0.406	0.441	0.342	0.261	0.134	0.056	0.034	0.123	0.2	0.355	0.461	0.431	0.358	0.258	0.137	0.045	1
0.472	0.449	0.472	0.458	0.467	0.511	0.487	0.456	0.487	0.491	0.445	0.401	0.406	0.473	0.449	0.438	0.827	0.409	0.462	0.44	0.041	0.131	0.222	0.364	0.417	0.405	0.348	0.259	0.14	0.046	0.044	0.123	0.212	0.324	0.445	0.418	0.364	0.259	0.144	0.042	1
0.524	0.485	0.451	0.474	0.455	0.408	0.417	0.499	0.508	0.526	0.429	0.726	0.633	0.519	0.402	0.407	0.422	0.423	0.4	0.399	0.052	0.191	0.298	0.328	0.409	0.418	0.321	0.21	0.119	0.041	0.049	0.174	0.304	0.335	0.417	0.42	0.322	0.183	0.121	0.06	1
0.164	0.147	0.145	0.161	0.159	0.164	0.167	0.168	0.161	0.163	0.08	0.065	0.198	0.457	0.525	0.071	0.051	0.054	0.05	0.054	0.006	0.058	0.134	0.121	0.132	0.155	0.123	0.049	0.015	0.005	0.009	0.026	0.107	0.131	0.184	0.189	0.104	0.027	0.015	0.007	1
0.206	0.182	0.166	0.16	0.169	0.167	0.163	0.168	0.164	0.153	0.081	0.067	0.07	0.069	0.415	0.508	0.283	0.135	0.049	0.045	0.008	0.024	0.093	0.142	0.143	0.135	0.118	0.113	0.067	0.006	0.007	0.021	0.033	0.152	0.235	0.178	0.147	0.061	0.015	0.004	1
0.175	0.15	0.139	0.146	0.161	0.157	0.162	0.17	0.168	0.165	0.077	0.149	0.394	0.62	0.1	0.05	0.055	0.05	0.051	0.053	0.01	0.106	0.11	0.117	0.155	0.138	0.111	0.028	0.014	0.006	0.009	0.047	0.133	0.131	0.189	0.183	0.056	0.027	0.016	0.007	1
0.181	0.17	0.164	0.167	0.168	0.158	0.148	0.156	0.169	0.164	0.069	0.074	0.075	0.073	0.07	0.082	0.731	0.361	0.049	0.057	0.008	0.02	0.04	0.114	0.155	0.144	0.141	0.118	0.075	0.007	0.007	0.021	0.034	0.096	0.191	0.168	0.133	0.123	0.047	0.006	1
0.248	0.184	0.176	0.168	0.151	0.147	0.15	0.146	0.135	0.154	0.085	0.147	0.754	0.334	0.055	0.059	0.052	0.053	0.056	0.072	0.011	0.069	0.117	0.137	0.147	0.205	0.083	0.033	0.02	0.008	0.025	0.11	0.138	0.159	0.134	0.138	0.076	0.028	0.017	0.006	1
0.29	0.177	0.163	0.151	0.143	0.149	0.153	0.139	0.163	0.251	0.136	0.076	0.069	0.068	0.064	0.081	0.144	0.618	0.471	0.056	0.007	0.02	0.041	0.108	0.138	0.171	0.145	0.119	0.133	0.013	0.053	0.026	0.028	0.06	0.151	0.17	0.127	0.149	0.124	0.007	1
0.241	0.219	0.21	0.218	0.217	0.197	0.193	0.177	0.19	0.196	0.083	0.079	0.086	0.416	0.812	0.279	0.09	0.078	0.079	0.066	0.008	0.023	0.129	0.174	0.216	0.182	0.157	0.105	0.025	0.009	0.011	0.025	0.124	0.243	0.201	0.164	0.161	0.072	0.023	0.006	1
0.229	0.211	0.201	0.184	0.196	0.255	0.199	0.214	0.199	0.187	0.095	0.095	0.085	0.09	0.089	0.321	0.716	0.408	0.109	0.077	0.007	0.023	0.049	0.111	0.24	0.212	0.162	0.179	0.045	0.009	0.012	0.022	0.052	0.164	0.225	0.171	0.151	0.136	0.095	0.011	1
0.211	0.215	0.211	0.214	0.218	0.202	0.199	0.204	0.222	0.23	0.119	0.245	0.46	0.541	0.156	0.134	0.085	0.107	0.115	0.163	0.009	0.044	0.158	0.209	0.229	0.23	0.079	0.056	0.035	0.014	0.04	0.107	0.127	0.145	0.161	0.182	0.167	0.08	0.037	0.016	1
0.195	0.199	0.216	0.204	0.208	0.192	0.188	0.199	0.209	0.194	0.098	0.088	0.089	0.198	0.484	0.476	0.304	0.14	0.073	0.073	0.008	0.024	0.039	0.17	0.258	0.243	0.178	0.055	0.022	0.008	0.009	0.042	0.134	0.153	0.165	0.164	0.138	0.122	0.065	0.008	1
0.161	0.145	0.141	0.143	0.145	0.132	0.127	0.134	0.129	0.129	0.089	0.094	0.551	0.119	0.072	0.109	0.107	0.084	0.08	0.08	0.009	0.059	0.088	0.1	0.129	0.149	0.08	0.045	0.025	0.009	0.01	0.069	0.097	0.115	0.131	0.127	0.067	0.044	0.024	0.007	1
0.143	0.124	0.126	0.122	0.122	0.126	0.14	0.141	0.14	0.133	0.087	0.073	0.073	0.069	0.073	0.073	0.278	0.349	0.151	0.091	0.008	0.022	0.037	0.05	0.142	0.151	0.098	0.09	0.049	0.009	0.011	0.025	0.04	0.074	0.116	0.119	0.095	0.088	0.074	0.016	1
0.153	0.145	0.15	0.147	0.128	0.146	0.126	0.134	0.126	0.124	0.086	0.077	0.078	0.194	0.448	0.13	0.086	0.116	0.093	0.076	0.01	0.025	0.061	0.108	0.118	0.155	0.128	0.046	0.026	0.009	0.009	0.036	0.083	0.11	0.128	0.128	0.093	0.063	0.028	0.008	1
0.128	0.129	0.115	0.107	0.153	0.153	0.133	0.137	0.157	0.125	0.088	0.137	0.207	0.256	0.255	0.099	0.076	0.074	0.076	0.075	0.009	0.025	0.087	0.157	0.141	0.114	0.064	0.039	0.023	0.008	0.015	0.054	0.068	0.108	0.115	0.119	0.111	0.045	0.024	0.008	1
0.145	0.141	0.148	0.146	0.126	0.137	0.125	0.131	0.126	0.12	0.09	0.075	0.076	0.078	0.074	0.111	0.28	0.376	0.079	0.106	0.01	0.026	0.041	0.067	0.114	0.119	0.124	0.127	0.032	0.01	0.008	0.021	0.045	0.096	0.122	0.123	0.117	0.078	0.048	0.011	1
0.093	0.08	0.071	0.073	0.075	0.071	0.081	0.081	0.077	0.078	0.084	0.071	0.074	0.12	0.1	0.063	0.068	0.067	0.065	0.067	0.008	0.022	0.043	0.056	0.067	0.081	0.052	0.031	0.021	0.007	0.011	0.027	0.04	0.057	0.07	0.066	0.053	0.037	0.02	0.007	1
0.128	0.098	0.098	0.097	0.103	0.117	0.109	0.114	0.121	0.107	0.084	0.255	0.274	0.067	0.068	0.066	0.073	0.065	0.063	0.066	0.01	0.056	0.083	0.101	0.095	0.09	0.045	0.036	0.021	0.009	0.02	0.056	0.061	0.084	0.104	0.112	0.055	0.031	0.018	0.006	1
0.136	0.122	0.091	0.107	0.115	0.112	0.113	0.101	0.091	0.088	0.086	0.077	0.409	0.105	0.071	0.064	0.068	0.064	0.063	0.064	0.009	0.038	0.07	0.098	0.091	0.102	0.066	0.036	0.019	0.009	0.01	0.053	0.077	0.102	0.105	0.082	0.051	0.032	0.018	0.006	1
0.098	0.09	0.094	0.088	0.084	0.097	0.094	0.102	0.092	0.083	0.134	0.255	0.071	0.067	0.065	0.06	0.061	0.067	0.071	0.068	0.02	0.043	0.057	0.07	0.087	0.078	0.044	0.032	0.02	0.008	0.017	0.044	0.055	0.077	0.097	0.066	0.043	0.032	0.021	0.007	1
0.132	0.125	0.123	0.153	0.109	0.12	0.146	0.147	0.142	0.133	0.086	0.07	0.084	0.098	0.318	0.314	0.109	0.073	0.099	0.088	0.012	0.028	0.067	0.107	0.112	0.125	0.104	0.069	0.027	0.01	0.007	0.021	0.048	0.112	0.138	0.118	0.125	0.06	0.027	0.009	1
0.134	0.106	0.142	0.117	0.092	0.079	0.089	0.08	0.083	0.073	0.07	0.056	0.062	0.108	0.112	0.149	0.161	0.134	0.082	0.064	0.006	0.018	0.041	0.047	0.078	0.101	0.073	0.093	0.031	0.008	0.008	0.024	0.044	0.083	0.1	0.106	0.07	0.037	0.018	0.007	1
0.124	0.097	0.12	0.108	0.131	0.126	0.104	0.102	0.135	0.132	0.08	0.06	0.094	0.197	0.189	0.19	0.12	0.096	0.095	0.062	0.007	0.018	0.051	0.085	0.145	0.145	0.078	0.035	0.019	0.006	0.009	0.037	0.071	0.086	0.086	0.098	0.088	0.057	0.047	0.01	1
0.102	0.086	0.088	0.079	0.081	0.076	0.078	0.072	0.083	0.076	0.072	0.054	0.058	0.068	0.092	0.149	0.101	0.085	0.081	0.064	0.006	0.019	0.025	0.041	0.106	0.061	0.063	0.057	0.021	0.008	0.008	0.016	0.04	0.069	0.081	0.065	0.051	0.039	0.027	0.011	1
0.102	0.082	0.082	0.086	0.085	0.092	0.095	0.104	0.088	0.072	0.102	0.084	0.085	0.07	0.127	0.132	0.08	0.073	0.075	0.063	0.01	0.027	0.036	0.065	0.097	0.086	0.058	0.036	0.022	0.007	0.015	0.026	0.043	0.066	0.08	0.082	0.064	0.04	0.022	0.006	1
0.1	0.079	0.079	0.068	0.075	0.074	0.07	0.071	0.076	0.084	0.092	0.079	0.073	0.098	0.128	0.084	0.061	0.057	0.054	0.053	0.009	0.023	0.044	0.061	0.071	0.067	0.056	0.03	0.019	0.007	0.01	0.029	0.05	0.059	0.064	0.067	0.052	0.035	0.015	0.005	1
0.086	0.07	0.078	0.08	0.082	0.082	0.075	0.076	0.079	0.083	0.075	0.063	0.069	0.065	0.116	0.131	0.068	0.072	0.07	0.065	0.008	0.02	0.035	0.064	0.07	0.074	0.057	0.037	0.02	0.008	0.01	0.02	0.034	0.059	0.072	0.07	0.058	0.041	0.022	0.006	1
0.107	0.073	0.071	0.075	0.074	0.063	0.071	0.068	0.071	0.066	0.08	0.057	0.055	0.064	0.122	0.118	0.065	0.061	0.059	0.06	0.006	0.018	0.029	0.052	0.069	0.071	0.065	0.033	0.018	0.007	0.012	0.02	0.046	0.054	0.065	0.058	0.052	0.036	0.018	0.007	1
0.115	0.118	0.125	0.12	0.134	0.136	0.124	0.116	0.107	0.124	0.096	0.1	0.318	0.216	0.096	0.082	0.08	0.075	0.076	0.077	0.012	0.05	0.08	0.099	0.107	0.116	0.074	0.04	0.022	0.008	0.009	0.037	0.08	0.126	0.113	0.101	0.068	0.043	0.024	0.006	1
0.112	0.096	0.111	0.121	0.123	0.129	0.126	0.126	0.112	0.114	0.076	0.067	0.073	0.08	0.078	0.09	0.237	0.276	0.11	0.079	0.008	0.023	0.039	0.077	0.107	0.106	0.093	0.075	0.044	0.011	0.007	0.019	0.037	0.057	0.106	0.118	0.123	0.07	0.039	0.008	1
0.115	0.124	0.116	0.13	0.129	0.131	0.125	0.12	0.12	0.125	0.098	0.081	0.087	0.194	0.346	0.112	0.089	0.076	0.078	0.079	0.01	0.031	0.078	0.095	0.112	0.11	0.098	0.049	0.024	0.008	0.008	0.024	0.062	0.106	0.143	0.102	0.091	0.047	0.024	0.008	1
0.177	0.161	0.139	0.132	0.141	0.149	0.161	0.155	0.157	0.165	0.093	0.074	0.092	0.617	0.263	0.079	0.08	0.084	0.073	0.084	0.008	0.043	0.12	0.118	0.134	0.136	0.135	0.041	0.025	0.008	0.01	0.039	0.112	0.121	0.148	0.145	0.114	0.044	0.025	0.01	1
0.201	0.198	0.202	0.195	0.178	0.172	0.165	0.173	0.183	0.155	0.074	0.08	0.212	0.509	0.37	0.183	0.105	0.1	0.108	0.087	0.008	0.055	0.128	0.137	0.136	0.159	0.139	0.1	0.037	0.012	0.007	0.029	0.096	0.201	0.208	0.181	0.121	0.041	0.022	0.008	1
0.152	0.13	0.137	0.148	0.157	0.144	0.153	0.156	0.166	0.145	0.093	0.074	0.067	0.074	0.078	0.072	0.302	0.548	0.092	0.078	0.009	0.025	0.04	0.085	0.148	0.144	0.116	0.101	0.066	0.01	0.009	0.022	0.037	0.076	0.129	0.153	0.127	0.121	0.06	0.008	1
0.17	0.156	0.158	0.162	0.163	0.143	0.156	0.161	0.162	0.152	0.192	0.386	0.453	0.093	0.077	0.068	0.077	0.081	0.084	0.075	0.053	0.085	0.101	0.117	0.145	0.14	0.071	0.045	0.026	0.011	0.009	0.091	0.113	0.148	0.205	0.117	0.049	0.037	0.018	0.007	1
0.205	0.174	0.175	0.174	0.178	0.157	0.164	0.156	0.181	0.175	0.086	0.064	0.067	0.066	0.066	0.093	0.328	0.463	0.363	0.142	0.009	0.021	0.037	0.098	0.164	0.136	0.131	0.125	0.105	0.046	0.014	0.02	0.032	0.053	0.145	0.207	0.188	0.138	0.063	0.009	1
0.153	0.147	0.158	0.154	0.157	0.164	0.163	0.14	0.161	0.168	0.093	0.08	0.129	0.556	0.313	0.091	0.073	0.078	0.08	0.079	0.01	0.057	0.102	0.125	0.153	0.137	0.117	0.054	0.022	0.007	0.011	0.027	0.108	0.138	0.148	0.162	0.12	0.038	0.023	0.008	1
0.193	0.237	0.247	0.247	0.241	0.262	0.198	0.201	0.209	0.187	0.213	0.199	0.189	0.175	0.171	0.697	0.185	0.182	0.146	0.075	0.011	0.034	0.101	0.201	0.256	0.189	0.159	0.112	0.038	0.009	0.019	0.082	0.127	0.171	0.179	0.17	0.208	0.124	0.023	0.006	1
0.175	0.171	0.203	0.204	0.181	0.164	0.166	0.166	0.17	0.192	0.152	0.355	0.403	0.172	0.13	0.122	0.116	0.122	0.116	0.102	0.022	0.059	0.145	0.171	0.164	0.127	0.086	0.062	0.046	0.013	0.02	0.083	0.131	0.123	0.181	0.164	0.107	0.055	0.024	0.008	1
0.17	0.188	0.188	0.188	0.16	0.164	0.171	0.187	0.291	0.306	0.125	0.151	0.162	0.179	0.171	0.131	0.14	0.331	0.421	0.203	0.023	0.079	0.103	0.096	0.129	0.181	0.167	0.14	0.078	0.012	0.012	0.033	0.057	0.089	0.183	0.201	0.159	0.141	0.087	0.045	1
0.222	0.212	0.235	0.245	0.221	0.185	0.213	0.185	0.196	0.171	0.187	0.204	0.187	0.171	0.547	0.256	0.17	0.179	0.103	0.086	0.012	0.045	0.093	0.162	0.256	0.189	0.165	0.08	0.031	0.01	0.032	0.076	0.123	0.149	0.181	0.239	0.134	0.045	0.048	0.015	1
0.254	0.228	0.207	0.199	0.223	0.2	0.2	0.212	0.231	0.209	0.127	0.121	0.137	0.174	0.563	0.397	0.156	0.173	0.168	0.166	0.011	0.034	0.097	0.158	0.216	0.217	0.18	0.102	0.047	0.021	0.011	0.048	0.123	0.17	0.185	0.185	0.159	0.124	0.059	0.017	1
0.28	0.28	0.291	0.285	0.263	0.274	0.261	0.246	0.25	0.248	0.161	0.151	0.515	0.588	0.187	0.205	0.259	0.224	0.206	0.177	0.016	0.057	0.16	0.215	0.252	0.262	0.197	0.104	0.058	0.021	0.016	0.102	0.166	0.202	0.238	0.259	0.174	0.107	0.062	0.015	1
0.298	0.318	0.358	0.247	0.267	0.268	0.259	0.252	0.243	0.262	0.129	0.137	0.171	0.17	0.209	0.456	0.711	0.353	0.22	0.224	0.011	0.043	0.076	0.173	0.238	0.257	0.269	0.201	0.101	0.019	0.013	0.04	0.095	0.226	0.293	0.233	0.205	0.169	0.088	0.03	1
0.249	0.271	0.252	0.244	0.246	0.272	0.295	0.319	0.327	0.296	0.129	0.116	0.147	0.151	0.194	0.337	0.485	0.741	0.295	0.189	0.016	0.037	0.116	0.18	0.244	0.241	0.222	0.195	0.117	0.02	0.012	0.03	0.064	0.151	0.247	0.257	0.256	0.233	0.12	0.016	1
0.316	0.34	0.333	0.328	0.354	0.331	0.273	0.282	0.282	0.299	0.229	0.502	0.621	0.478	0.268	0.212	0.218	0.197	0.197	0.205	0.023	0.115	0.208	0.271	0.289	0.263	0.209	0.107	0.069	0.018	0.017	0.119	0.265	0.303	0.259	0.244	0.165	0.117	0.062	0.017	1
0.247	0.205	0.183	0.22	0.22	0.222	0.241	0.265	0.217	0.213	0.15	0.247	0.665	0.205	0.161	0.175	0.157	0.164	0.157	0.161	0.02	0.085	0.13	0.189	0.217	0.215	0.133	0.081	0.036	0.012	0.02	0.104	0.141	0.165	0.179	0.215	0.123	0.101	0.058	0.01	1
0.225	0.215	0.215	0.223	0.235	0.219	0.197	0.21	0.183	0.216	0.131	0.118	0.119	0.138	0.126	0.145	0.254	0.632	0.32	0.157	0.013	0.039	0.056	0.099	0.196	0.21	0.177	0.166	0.098	0.019	0.01	0.042	0.062	0.13	0.203	0.186	0.176	0.142	0.101	0.021	1
0.331	0.328	0.232	0.259	0.265	0.242	0.237	0.226	0.228	0.214	0.115	0.124	0.142	0.19	0.16	0.222	0.471	0.712	0.228	0.199	0.009	0.036	0.062	0.13	0.226	0.234	0.219	0.227	0.113	0.026	0.013	0.04	0.085	0.191	0.253	0.231	0.193	0.153	0.108	0.017	1
0.338	0.331	0.322	0.327	0.365	0.297	0.272	0.279	0.29	0.286	0.187	0.36	0.652	0.528	0.339	0.222	0.221	0.202	0.211	0.191	0.017	0.102	0.18	0.279	0.296	0.256	0.225	0.11	0.07	0.022	0.018	0.098	0.258	0.303	0.263	0.241	0.176	0.116	0.063	0.02	1
0.299	0.31	0.303	0.29	0.289	0.294	0.298	0.275	0.304	0.307	0.195	0.323	0.794	0.432	0.228	0.2	0.214	0.186	0.185	0.215	0.03	0.121	0.2	0.23	0.266	0.253	0.204	0.102	0.064	0.017	0.016	0.105	0.233	0.243	0.268	0.262	0.168	0.102	0.072	0.017	1
0.292	0.276	0.27	0.257	0.283	0.295	0.297	0.288	0.315	0.302	0.159	0.161	0.155	0.188	0.177	0.373	0.7	0.448	0.297	0.231	0.018	0.052	0.092	0.199	0.275	0.25	0.241	0.16	0.119	0.034	0.015	0.051	0.069	0.153	0.316	0.266	0.244	0.2	0.098	0.029	1
0.302	0.337	0.297	0.295	0.305	0.302	0.29	0.288	0.311	0.293	0.211	0.433	0.649	0.452	0.244	0.238	0.22	0.186	0.167	0.223	0.03	0.139	0.2	0.207	0.262	0.277	0.22	0.094	0.065	0.022	0.023	0.099	0.192	0.299	0.307	0.275	0.143	0.092	0.059	0.025	1
0.29	0.301	0.274	0.266	0.279	0.272	0.266	0.247	0.289	0.328	0.14	0.136	0.16	0.2	0.467	0.783	0.351	0.214	0.193	0.211	0.021	0.045	0.124	0.22	0.249	0.265	0.223	0.172	0.072	0.024	0.017	0.04	0.089	0.241	0.272	0.273	0.23	0.167	0.061	0.023	1
0.298	0.285	0.274	0.312	0.293	0.275	0.285	0.276	0.315	0.301	0.205	0.157	0.175	0.173	0.255	0.497	0.471	0.475	0.255	0.273	0.017	0.053	0.121	0.202	0.271	0.253	0.204	0.189	0.121	0.03	0.034	0.054	0.084	0.14	0.262	0.36	0.247	0.168	0.087	0.029	1
0.331	0.315	0.312	0.339	0.319	0.296	0.338	0.298	0.298	0.31	0.19	0.281	0.665	0.576	0.265	0.247	0.238	0.246	0.209	0.245	0.028	0.117	0.181	0.271	0.259	0.289	0.207	0.12	0.083	0.031	0.019	0.104	0.193	0.244	0.313	0.334	0.189	0.106	0.059	0.022	1
0.202	0.199	0.196	0.195	0.205	0.226	0.212	0.208	0.189	0.194	0.123	0.109	0.193	0.287	0.32	0.32	0.253	0.147	0.141	0.136	0.012	0.038	0.058	0.175	0.237	0.227	0.143	0.074	0.041	0.011	0.01	0.076	0.11	0.135	0.144	0.194	0.163	0.114	0.049	0.016	1
0.187	0.161	0.126	0.154	0.145	0.137	0.14	0.135	0.154	0.144	0.099	0.095	0.103	0.156	0.295	0.305	0.148	0.094	0.106	0.093	0.01	0.03	0.083	0.097	0.119	0.138	0.168	0.053	0.034	0.011	0.011	0.049	0.085	0.085	0.129	0.156	0.127	0.065	0.029	0.008	1
0.152	0.187	0.161	0.188	0.162	0.158	0.137	0.156	0.153	0.128	0.106	0.095	0.162	0.224	0.281	0.342	0.132	0.09	0.081	0.08	0.013	0.052	0.09	0.096	0.131	0.154	0.127	0.095	0.026	0.009	0.011	0.032	0.065	0.148	0.179	0.21	0.074	0.041	0.023	0.009	1
0.175	0.185	0.161	0.155	0.13	0.132	0.122	0.146	0.204	0.179	0.119	0.109	0.101	0.124	0.171	0.219	0.31	0.202	0.13	0.112	0.018	0.041	0.073	0.109	0.125	0.123	0.129	0.105	0.06	0.011	0.013	0.026	0.058	0.117	0.159	0.141	0.134	0.096	0.043	0.01	1
0.131	0.107	0.231	0.186	0.117	0.099	0.11	0.22	0.244	0.214	0.114	0.096	0.092	0.112	0.258	0.276	0.228	0.207	0.19	0.104	0.012	0.029	0.067	0.077	0.246	0.16	0.147	0.054	0.031	0.009	0.01	0.029	0.072	0.121	0.158	0.098	0.105	0.119	0.088	0.031	1
0.202	0.133	0.146	0.138	0.143	0.154	0.135	0.123	0.115	0.119	0.109	0.102	0.099	0.126	0.269	0.301	0.11	0.098	0.102	0.099	0.008	0.028	0.058	0.099	0.123	0.153	0.13	0.055	0.034	0.016	0.014	0.04	0.089	0.107	0.13	0.126	0.091	0.076	0.025	0.008	1
0.147	0.157	0.156	0.149	0.139	0.11	0.124	0.121	0.121	0.178	0.113	0.108	0.095	0.092	0.096	0.101	0.125	0.344	0.238	0.092	0.012	0.025	0.046	0.095	0.128	0.113	0.095	0.114	0.062	0.01	0.014	0.036	0.056	0.083	0.116	0.128	0.092	0.091	0.078	0.007	1
0.14	0.142	0.134	0.143	0.154	0.128	0.119	0.122	0.119	0.119	0.103	0.096	0.113	0.284	0.259	0.095	0.091	0.09	0.093	0.095	0.012	0.029	0.071	0.093	0.124	0.147	0.1	0.045	0.027	0.01	0.011	0.045	0.081	0.108	0.121	0.113	0.102	0.043	0.025	0.01	1
0.14	0.118	0.126	0.116	0.126	0.173	0.171	0.19	0.163	0.174	0.203	0.355	0.228	0.134	0.092	0.088	0.105	0.097	0.095	0.101	0.016	0.108	0.141	0.095	0.113	0.118	0.067	0.044	0.03	0.012	0.015	0.056	0.088	0.146	0.118	0.148	0.084	0.054	0.027	0.01	1
0.147	0.124	0.118	0.119	0.123	0.145	0.192	0.158	0.195	0.167	0.093	0.093	0.088	0.107	0.108	0.144	0.287	0.323	0.154	0.098	0.009	0.029	0.048	0.097	0.183	0.155	0.09	0.077	0.052	0.009	0.015	0.028	0.046	0.077	0.112	0.133	0.158	0.081	0.086	0.012	1
0.156	0.153	0.141	0.162	0.181	0.175	0.168	0.17	0.127	0.125	0.117	0.123	0.126	0.149	0.173	0.293	0.217	0.149	0.1	0.112	0.012	0.034	0.064	0.124	0.149	0.147	0.105	0.081	0.052	0.011	0.014	0.035	0.064	0.098	0.162	0.191	0.108	0.064	0.029	0.012	1
0.174	0.16	0.143	0.133	0.142	0.154	0.145	0.16	0.171	0.174	0.124	0.158	0.25	0.285	0.119	0.119	0.127	0.13	0.127	0.122	0.019	0.076	0.083	0.106	0.134	0.132	0.111	0.061	0.042	0.015	0.013	0.047	0.093	0.109	0.156	0.166	0.083	0.06	0.041	0.012	1
0.183	0.171	0.184	0.161	0.154	0.152	0.183	0.15	0.152	0.158	0.158	0.147	0.138	0.137	0.155	0.237	0.225	0.188	0.143	0.129	0.015	0.049	0.068	0.105	0.128	0.174	0.137	0.107	0.031	0.011	0.017	0.052	0.081	0.118	0.15	0.145	0.109	0.095	0.048	0.011	1
0.211	0.147	0.163	0.174	0.168	0.172	0.167	0.141	0.151	0.15	0.186	0.229	0.21	0.264	0.15	0.115	0.107	0.122	0.123	0.135	0.012	0.031	0.103	0.148	0.166	0.168	0.078	0.06	0.04	0.013	0.042	0.071	0.107	0.118	0.123	0.131	0.108	0.073	0.039	0.01	1
0.164	0.142	0.158	0.182	0.172	0.172	0.177	0.142	0.128	0.135	0.129	0.112	0.117	0.127	0.144	0.132	0.292	0.236	0.176	0.104	0.01	0.039	0.061	0.095	0.146	0.147	0.129	0.083	0.058	0.019	0.013	0.034	0.066	0.089	0.149	0.191	0.124	0.067	0.045	0.01	1
0.233	0.199	0.248	0.267	0.285	0.26	0.326	0.234	0.274	0.267	0.149	0.191	0.209	0.25	0.404	0.377	0.346	0.275	0.199	0.208	0.018	0.071	0.137	0.181	0.214	0.227	0.23	0.162	0.049	0.009	0.012	0.036	0.128	0.189	0.218	0.262	0.215	0.166	0.056	0.018	1
0.199	0.266	0.229	0.165	0.159	0.159	0.213	0.245	0.198	0.195	0.12	0.123	0.182	0.234	0.341	0.386	0.314	0.148	0.092	0.097	0.014	0.043	0.124	0.148	0.161	0.187	0.159	0.136	0.03	0.011	0.013	0.038	0.101	0.176	0.195	0.184	0.166	0.094	0.035	0.01	1
0.198	0.169	0.181	0.191	0.201	0.215	0.184	0.188	0.236	0.254	0.149	0.198	0.493	0.261	0.309	0.172	0.111	0.105	0.095	0.122	0.022	0.081	0.183	0.179	0.16	0.13	0.138	0.071	0.034	0.011	0.013	0.04	0.158	0.18	0.189	0.149	0.171	0.071	0.028	0.01	1
0.199	0.211	0.18	0.188	0.225	0.252	0.199	0.151	0.155	0.176	0.166	0.312	0.418	0.278	0.228	0.126	0.102	0.093	0.11	0.103	0.018	0.055	0.135	0.164	0.234	0.174	0.087	0.054	0.034	0.013	0.02	0.109	0.141	0.129	0.224	0.153	0.097	0.061	0.028	0.009	1
0.196	0.245	0.254	0.182	0.155	0.16	0.204	0.218	0.242	0.197	0.124	0.105	0.113	0.139	0.206	0.241	0.408	0.33	0.269	0.126	0.013	0.038	0.07	0.145	0.167	0.17	0.17	0.157	0.085	0.011	0.014	0.036	0.065	0.128	0.199	0.196	0.167	0.145	0.064	0.013	1
0.15	0.156	0.145	0.164	0.187	0.192	0.17	0.191	0.17	0.172	0.113	0.104	0.107	0.114	0.169	0.303	0.402	0.185	0.115	0.096	0.009	0.036	0.075	0.13	0.163	0.165	0.109	0.107	0.042	0.011	0.011	0.031	0.062	0.099	0.141	0.188	0.176	0.095	0.035	0.011	1
0.259	0.196	0.204	0.246	0.213	0.213	0.182	0.234	0.239	0.205	0.127	0.115	0.132	0.159	0.192	0.275	0.371	0.39	0.243	0.187	0.012	0.033	0.068	0.161	0.221	0.175	0.16	0.144	0.09	0.03	0.013	0.04	0.063	0.152	0.193	0.217	0.167	0.162	0.075	0.014	1
0.185	0.183	0.171	0.197	0.19	0.213	0.189	0.196	0.21	0.263	0.125	0.15	0.31	0.404	0.281	0.292	0.121	0.112	0.098	0.112	0.018	0.056	0.167	0.189	0.169	0.136	0.13	0.091	0.033	0.009	0.014	0.035	0.109	0.193	0.199	0.17	0.134	0.105	0.03	0.01	1
0.149	0.143	0.157	0.145	0.158	0.18	0.189	0.167	0.189	0.166	0.117	0.107	0.17	0.328	0.376	0.156	0.111	0.09	0.097	0.092	0.012	0.046	0.116	0.146	0.147	0.143	0.12	0.052	0.029	0.011	0.012	0.051	0.069	0.115	0.164	0.203	0.114	0.054	0.029	0.01	1
0.178	0.19	0.207	0.18	0.188	0.194	0.188	0.17	0.224	0.226	0.129	0.106	0.106	0.107	0.129	0.171	0.196	0.252	0.44	0.303	0.02	0.033	0.064	0.104	0.155	0.18	0.144	0.136	0.107	0.03	0.012	0.034	0.056	0.081	0.143	0.209	0.169	0.13	0.109	0.032	1
0.139	0.132	0.126	0.121	0.131	0.113	0.133	0.161	0.126	0.133	0.119	0.106	0.104	0.131	0.128	0.156	0.146	0.19	0.128	0.109	0.014	0.033	0.058	0.082	0.131	0.119	0.103	0.069	0.037	0.012	0.012	0.03	0.065	0.094	0.116	0.113	0.089	0.082	0.046	0.011	1
0.127	0.104	0.116	0.119	0.123	0.132	0.126	0.133	0.134	0.118	0.113	0.1	0.109	0.13	0.159	0.155	0.121	0.115	0.127	0.103	0.01	0.031	0.053	0.103	0.125	0.107	0.086	0.055	0.035	0.01	0.012	0.033	0.061	0.085	0.106	0.106	0.095	0.066	0.038	0.013	1
0.146	0.138	0.14	0.131	0.128	0.155	0.153	0.128	0.137	0.129	0.128	0.121	0.128	0.181	0.244	0.12	0.11	0.118	0.113	0.121	0.009	0.03	0.085	0.117	0.119	0.124	0.092	0.066	0.035	0.013	0.016	0.038	0.078	0.107	0.119	0.118	0.107	0.064	0.031	0.012	1
0.252	0.268	0.251	0.294	0.285	0.243	0.289	0.271	0.281	0.266	0.249	0.232	0.21	0.21	0.297	0.462	0.357	0.282	0.217	0.19	0.027	0.067	0.131	0.194	0.261	0.245	0.184	0.135	0.084	0.019	0.023	0.06	0.129	0.173	0.283	0.244	0.211	0.136	0.075	0.016	1
0.285	0.276	0.266	0.241	0.306	0.297	0.296	0.27	0.278	0.261	0.226	0.254	0.227	0.295	0.387	0.425	0.255	0.252	0.215	0.244	0.025	0.067	0.154	0.205	0.252	0.235	0.202	0.138	0.079	0.031	0.023	0.064	0.11	0.227	0.287	0.27	0.187	0.128	0.067	0.025	1
0.271	0.278	0.247	0.286	0.298	0.295	0.264	0.279	0.257	0.23	0.228	0.194	0.204	0.254	0.226	0.294	0.422	0.395	0.249	0.24	0.017	0.064	0.107	0.199	0.235	0.248	0.198	0.16	0.099	0.027	0.022	0.061	0.121	0.156	0.265	0.268	0.214	0.152	0.07	0.021	1
0.196	0.199	0.212	0.198	0.212	0.233	0.234	0.247	0.266	0.278	0.199	0.23	0.225	0.381	0.268	0.198	0.178	0.183	0.212	0.199	0.021	0.086	0.13	0.178	0.216	0.207	0.131	0.099	0.049	0.017	0.023	0.07	0.09	0.16	0.203	0.211	0.194	0.097	0.063	0.03	1
0.116	0.103	0.1	0.096	0.103	0.105	0.104	0.094	0.095	0.1	0.061	0.265	0.299	0.123	0.047	0.044	0.047	0.042	0.044	0.045	0.007	0.04	0.09	0.107	0.094	0.091	0.036	0.023	0.013	0.005	0.012	0.076	0.074	0.077	0.085	0.082	0.062	0.02	0.013	0.004	1
0.109	0.105	0.103	0.104	0.093	0.1	0.103	0.102	0.095	0.101	0.058	0.045	0.044	0.042	0.043	0.043	0.339	0.265	0.086	0.048	0.005	0.013	0.023	0.036	0.108	0.119	0.081	0.083	0.033	0.006	0.007	0.016	0.023	0.065	0.1	0.092	0.074	0.069	0.054	0.008	1
0.134	0.096	0.105	0.112	0.105	0.098	0.101	0.104	0.107	0.109	0.062	0.053	0.111	0.234	0.304	0.114	0.048	0.052	0.051	0.047	0.006	0.018	0.052	0.116	0.125	0.08	0.069	0.046	0.016	0.006	0.007	0.024	0.087	0.103	0.079	0.083	0.079	0.052	0.014	0.005	1
0.451	0.476	0.729	0.552	0.437	0.288	0.25	0.215	0.233	0.253	0.406	0.388	0.356	0.346	0.387	0.462	0.446	0.35	0.374	0.371	0.036	0.063	0.106	0.199	0.355	0.436	0.288	0.274	0.16	0.024	0.064	0.185	0.232	0.29	0.327	0.39	0.221	0.138	0.063	0.027	2
0.474	0.459	0.513	0.473	0.359	0.479	0.774	0.528	0.406	0.277	0.427	0.55	0.612	0.527	0.457	0.485	0.496	0.362	0.4	0.435	0.03	0.128	0.266	0.337	0.463	0.429	0.358	0.238	0.089	0.041	0.029	0.181	0.26	0.408	0.402	0.386	0.303	0.271	0.099	0.032	2
0.391	0.389	0.437	0.725	0.672	0.513	0.439	0.287	0.312	0.301	0.396	0.4	0.313	0.402	0.438	0.529	0.584	0.483	0.436	0.481	0.022	0.067	0.161	0.316	0.378	0.456	0.397	0.275	0.126	0.035	0.053	0.083	0.227	0.395	0.382	0.39	0.335	0.229	0.092	0.049	2
0.421	0.426	0.372	0.413	0.38	0.45	0.725	0.675	0.485	0.407	0.473	0.498	0.513	0.385	0.397	0.452	0.47	0.559	0.475	0.532	0.028	0.137	0.265	0.314	0.493	0.503	0.303	0.188	0.097	0.054	0.047	0.16	0.242	0.254	0.35	0.455	0.341	0.288	0.182	0.059	2
0.052	0.037	0.071	0.087	0.283	0.521	0.169	0.059	0.045	0.039	0.134	0.138	0.143	0.15	0.164	0.131	0.126	0.12	0.124	0.106	0.004	0.016	0.105	0.103	0.107	0.14	0.133	0.04	0.014	0.005	0.006	0.011	0.039	0.128	0.191	0.112	0.092	0.071	0.012	0.004	2
0.055	0.036	0.044	0.08	0.104	0.241	0.54	0.238	0.063	0.045	0.205	0.149	0.118	0.131	0.137	0.15	0.167	0.129	0.127	0.116	0.006	0.045	0.136	0.132	0.111	0.126	0.113	0.029	0.01	0.004	0.01	0.019	0.04	0.093	0.122	0.164	0.153	0.086	0.023	0.006	2
0.075	0.071	0.269	0.552	0.26	0.1	0.055	0.051	0.052	0.051	0.167	0.16	0.154	0.151	0.14	0.151	0.152	0.141	0.155	0.161	0.006	0.018	0.057	0.114	0.117	0.128	0.127	0.141	0.049	0.007	0.007	0.019	0.123	0.185	0.153	0.123	0.102	0.031	0.015	0.006	2
0.067	0.044	0.049	0.053	0.062	0.095	0.508	0.389	0.175	0.075	0.16	0.156	0.153	0.15	0.146	0.142	0.154	0.145	0.153	0.158	0.017	0.095	0.099	0.116	0.125	0.155	0.098	0.027	0.017	0.008	0.007	0.015	0.024	0.044	0.172	0.187	0.138	0.104	0.059	0.008	2
0.116	0.086	0.087	0.284	0.417	0.378	0.167	0.091	0.073	0.079	0.256	0.19	0.199	0.204	0.241	0.144	0.127	0.137	0.126	0.142	0.013	0.044	0.126	0.143	0.145	0.155	0.119	0.107	0.025	0.006	0.014	0.04	0.085	0.198	0.19	0.178	0.123	0.039	0.015	0.004	2
0.055	0.034	0.039	0.058	0.052	0.1	0.51	0.308	0.06	0.057	0.13	0.111	0.115	0.125	0.126	0.121	0.145	0.142	0.126	0.127	0.008	0.035	0.103	0.125	0.117	0.106	0.093	0.028	0.014	0.005	0.006	0.013	0.023	0.08	0.111	0.106	0.11	0.16	0.019	0.004	2
0.072	0.055	0.113	0.632	0.139	0.067	0.062	0.037	0.047	0.091	0.138	0.129	0.129	0.121	0.116	0.117	0.12	0.126	0.17	0.15	0.004	0.016	0.024	0.094	0.126	0.126	0.128	0.104	0.025	0.008	0.007	0.035	0.113	0.109	0.109	0.107	0.093	0.04	0.026	0.017	2
0.064	0.053	0.055	0.106	0.307	0.407	0.185	0.051	0.045	0.043	0.151	0.14	0.139	0.173	0.119	0.113	0.113	0.128	0.118	0.105	0.004	0.014	0.033	0.172	0.128	0.145	0.112	0.024	0.014	0.005	0.007	0.029	0.09	0.106	0.12	0.1	0.092	0.073	0.026	0.004	2
0.108	0.09	0.128	0.168	0.471	0.55	0.223	0.166	0.112	0.086	0.183	0.234	0.22	0.203	0.201	0.203	0.178	0.189	0.21	0.259	0.011	0.056	0.097	0.15	0.182	0.212	0.194	0.1	0.027	0.013	0.014	0.039	0.096	0.14	0.192	0.206	0.19	0.127	0.03	0.005	2
0.155	0.118	0.068	0.109	0.164	0.259	0.425	0.468	0.328	0.187	0.196	0.19	0.205	0.269	0.251	0.247	0.236	0.248	0.227	0.211	0.019	0.127	0.171	0.151	0.18	0.173	0.202	0.071	0.025	0.021	0.012	0.021	0.049	0.099	0.217	0.269	0.244	0.147	0.07	0.012	2
0.085	0.081	0.198	0.68	0.482	0.229	0.142	0.058	0.041	0.041	0.199	0.205	0.226	0.198	0.226	0.211	0.201	0.186	0.188	0.188	0.005	0.021	0.062	0.157	0.167	0.204	0.212	0.154	0.024	0.005	0.007	0.05	0.129	0.21	0.216	0.189	0.134	0.058	0.017	0.003	2
0.086	0.064	0.061	0.068	0.064	0.073	0.423	0.602	0.419	0.171	0.225	0.19	0.214	0.214	0.233	0.211	0.213	0.176	0.177	0.183	0.029	0.114	0.195	0.187	0.187	0.149	0.085	0.037	0.024	0.011	0.007	0.015	0.034	0.109	0.175	0.203	0.194	0.171	0.103	0.007	2
0.087	0.352	0.605	0.439	0.235	0.182	0.138	0.113	0.091	0.113	0.197	0.182	0.205	0.308	0.269	0.28	0.247	0.248	0.232	0.187	0.006	0.026	0.057	0.101	0.256	0.264	0.208	0.167	0.084	0.006	0.032	0.113	0.133	0.165	0.209	0.246	0.204	0.05	0.02	0.005	2
0.114	0.104	0.103	0.086	0.128	0.146	0.228	0.533	0.245	0.159	0.159	0.147	0.177	0.173	0.16	0.192	0.197	0.206	0.227	0.203	0.017	0.081	0.112	0.136	0.178	0.189	0.103	0.051	0.046	0.013	0.011	0.03	0.038	0.068	0.192	0.175	0.136	0.155	0.105	0.013	2
0.059	0.046	0.042	0.051	0.138	0.382	0.059	0.048	0.066	0.161	0.087	0.125	0.119	0.089	0.109	0.077	0.081	0.093	0.12	0.142	0.015	0.041	0.048	0.099	0.082	0.075	0.088	0.043	0.02	0.008	0.005	0.013	0.039	0.073	0.077	0.094	0.108	0.08	0.021	0.011	2
0.065	0.048	0.049	0.045	0.052	0.149	0.363	0.054	0.05	0.077	0.081	0.11	0.085	0.073	0.094	0.063	0.086	0.099	0.126	0.134	0.008	0.017	0.075	0.073	0.076	0.085	0.075	0.03	0.024	0.011	0.005	0.012	0.026	0.069	0.072	0.082	0.085	0.089	0.024	0.008	2
0.062	0.044	0.052	0.06	0.12	0.485	0.315	0.07	0.053	0.061	0.147	0.141	0.121	0.138	0.146	0.123	0.118	0.134	0.105	0.126	0.01	0.018	0.073	0.155	0.127	0.095	0.123	0.03	0.012	0.005	0.01	0.017	0.05	0.102	0.12	0.144	0.091	0.08	0.032	0.004	2
0.055	0.035	0.033	0.033	0.038	0.043	0.096	0.397	0.272	0.058	0.118	0.126	0.143	0.118	0.109	0.095	0.087	0.085	0.088	0.082	0.006	0.071	0.12	0.092	0.092	0.078	0.028	0.017	0.011	0.005	0.006	0.013	0.02	0.058	0.093	0.116	0.092	0.058	0.059	0.008	2
0.054	0.036	0.046	0.312	0.272	0.04	0.041	0.032	0.034	0.034	0.092	0.088	0.089	0.088	0.075	0.092	0.106	0.081	0.088	0.1	0.005	0.011	0.02	0.071	0.092	0.078	0.069	0.075	0.023	0.004	0.006	0.014	0.067	0.068	0.08	0.105	0.074	0.019	0.01	0.003	2
0.053	0.05	0.367	0.228	0.04	0.041	0.035	0.035	0.037	0.036	0.128	0.105	0.09	0.094	0.076	0.086	0.09	0.087	0.072	0.092	0.004	0.012	0.021	0.05	0.095	0.091	0.079	0.076	0.027	0.005	0.006	0.067	0.072	0.076	0.076	0.068	0.063	0.016	0.01	0.004	2
0.055	0.04	0.034	0.033	0.04	0.047	0.061	0.231	0.458	0.093	0.151	0.102	0.126	0.14	0.117	0.107	0.097	0.089	0.081	0.088	0.01	0.074	0.139	0.097	0.101	0.066	0.026	0.017	0.01	0.005	0.008	0.015	0.024	0.052	0.092	0.093	0.114	0.072	0.058	0.02	2
0.061	0.054	0.088	0.25	0.163	0.042	0.036	0.036	0.044	0.035	0.074	0.045	0.05	0.069	0.079	0.101	0.098	0.105	0.1	0.096	0.004	0.009	0.02	0.038	0.054	0.097	0.075	0.072	0.027	0.007	0.006	0.026	0.027	0.056	0.08	0.098	0.078	0.016	0.009	0.008	2
0.121	0.127	0.106	0.079	0.063	0.064	0.114	0.337	0.147	0.051	0.144	0.161	0.133	0.119	0.129	0.094	0.111	0.101	0.102	0.115	0.007	0.044	0.083	0.092	0.102	0.126	0.091	0.036	0.018	0.005	0.013	0.044	0.073	0.089	0.097	0.077	0.062	0.079	0.06	0.005	2
0.069	0.053	0.105	0.174	0.308	0.368	0.283	0.075	0.042	0.04	0.195	0.146	0.191	0.16	0.109	0.135	0.128	0.118	0.15	0.174	0.005	0.013	0.043	0.18	0.201	0.115	0.111	0.06	0.02	0.007	0.009	0.036	0.126	0.108	0.111	0.084	0.132	0.122	0.015	0.004	2
0.128	0.132	0.11	0.206	0.349	0.481	0.284	0.198	0.109	0.108	0.216	0.171	0.261	0.226	0.192	0.183	0.188	0.201	0.195	0.254	0.007	0.084	0.126	0.156	0.184	0.143	0.137	0.112	0.062	0.034	0.008	0.023	0.076	0.156	0.206	0.273	0.226	0.061	0.019	0.004	2
0.081	0.087	0.111	0.121	0.1	0.14	0.354	0.639	0.252	0.107	0.266	0.266	0.261	0.187	0.161	0.17	0.177	0.197	0.158	0.152	0.013	0.068	0.194	0.234	0.205	0.154	0.073	0.031	0.02	0.007	0.009	0.049	0.081	0.163	0.142	0.145	0.128	0.191	0.081	0.005	2
0.082	0.167	0.352	0.547	0.441	0.12	0.077	0.057	0.055	0.048	0.188	0.168	0.175	0.186	0.204	0.201	0.218	0.198	0.209	0.191	0.006	0.016	0.062	0.145	0.159	0.164	0.154	0.134	0.106	0.023	0.011	0.02	0.123	0.186	0.245	0.271	0.066	0.029	0.013	0.004	2
0.073	0.061	0.067	0.08	0.362	0.719	0.291	0.117	0.106	0.091	0.211	0.198	0.177	0.2	0.202	0.217	0.189	0.172	0.176	0.191	0.011	0.045	0.136	0.158	0.164	0.185	0.183	0.061	0.016	0.007	0.009	0.019	0.045	0.177	0.231	0.182	0.15	0.107	0.039	0.009	2
0.096	0.249	0.51	0.334	0.067	0.043	0.039	0.047	0.045	0.051	0.151	0.153	0.163	0.154	0.165	0.181	0.156	0.131	0.137	0.094	0.004	0.018	0.027	0.038	0.134	0.185	0.183	0.099	0.045	0.006	0.019	0.106	0.113	0.126	0.13	0.15	0.058	0.02	0.012	0.005	2
0.114	0.143	0.667	0.285	0.129	0.09	0.082	0.052	0.049	0.042	0.174	0.179	0.15	0.154	0.154	0.183	0.203	0.152	0.152	0.157	0.006	0.016	0.029	0.068	0.165	0.185	0.152	0.116	0.078	0.015	0.014	0.092	0.129	0.147	0.148	0.18	0.074	0.028	0.015	0.004	2
0.084	0.123	0.282	0.549	0.282	0.074	0.058	0.049	0.043	0.046	0.165	0.172	0.161	0.168	0.16	0.163	0.147	0.138	0.138	0.17	0.005	0.012	0.027	0.109	0.164	0.153	0.153	0.121	0.037	0.012	0.009	0.06	0.138	0.149	0.148	0.133	0.098	0.031	0.02	0.007	2
0.088	0.101	0.238	0.561	0.341	0.132	0.072	0.102	0.056	0.047	0.171	0.167	0.168	0.164	0.154	0.163	0.16	0.196	0.2	0.189	0.005	0.015	0.038	0.115	0.166	0.188	0.151	0.121	0.057	0.012	0.007	0.044	0.131	0.165	0.155	0.155	0.101	0.077	0.025	0.005	2
0.168	0.177	0.342	0.394	0.227	0.173	0.133	0.106	0.101	0.096	0.169	0.162	0.182	0.236	0.213	0.245	0.214	0.166	0.17	0.157	0.005	0.021	0.075	0.157	0.163	0.15	0.156	0.138	0.08	0.01	0.012	0.066	0.137	0.157	0.16	0.209	0.144	0.053	0.013	0.004	2
0.093	0.118	0.538	0.44	0.166	0.093	0.085	0.05	0.044	0.043	0.166	0.158	0.159	0.187	0.161	0.154	0.159	0.154	0.227	0.155	0.004	0.012	0.028	0.09	0.153	0.17	0.176	0.136	0.06	0.01	0.012	0.075	0.141	0.138	0.152	0.147	0.106	0.049	0.015	0.005	2
0.215	0.15	0.124	0.116	0.14	0.307	0.384	0.269	0.196	0.126	0.217	0.2	0.216	0.224	0.211	0.177	0.206	0.187	0.179	0.209	0.013	0.06	0.119	0.173	0.185	0.191	0.136	0.074	0.049	0.017	0.03	0.051	0.08	0.145	0.179	0.177	0.162	0.115	0.065	0.012	2
0.163	0.107	0.093	0.082	0.099	0.266	0.566	0.345	0.112	0.061	0.218	0.179	0.177	0.173	0.18	0.178	0.175	0.176	0.188	0.233	0.009	0.062	0.128	0.149	0.176	0.174	0.115	0.055	0.04	0.036	0.016	0.037	0.045	0.116	0.202	0.2	0.146	0.125	0.046	0.01	2
0.059	0.037	0.039	0.204	0.186	0.034	0.037	0.037	0.037	0.042	0.075	0.056	0.068	0.076	0.068	0.074	0.057	0.084	0.079	0.07	0.006	0.015	0.019	0.043	0.064	0.063	0.064	0.057	0.012	0.006	0.006	0.013	0.037	0.064	0.069	0.065	0.062	0.022	0.01	0.003	2
0.054	0.034	0.042	0.041	0.051	0.1	0.279	0.085	0.036	0.033	0.089	0.056	0.086	0.075	0.069	0.068	0.085	0.068	0.075	0.078	0.005	0.013	0.049	0.071	0.063	0.085	0.048	0.02	0.013	0.005	0.006	0.013	0.023	0.052	0.072	0.075	0.051	0.048	0.029	0.003	2
0.062	0.049	0.045	0.041	0.044	0.083	0.207	0.164	0.042	0.037	0.082	0.074	0.079	0.072	0.073	0.073	0.066	0.081	0.084	0.092	0.004	0.013	0.053	0.067	0.078	0.083	0.041	0.027	0.014	0.006	0.007	0.014	0.027	0.059	0.07	0.066	0.044	0.045	0.049	0.004	2
0.056	0.04	0.048	0.12	0.15	0.039	0.039	0.038	0.034	0.045	0.088	0.057	0.053	0.051	0.053	0.058	0.053	0.058	0.058	0.077	0.007	0.011	0.02	0.047	0.056	0.051	0.045	0.045	0.013	0.005	0.007	0.025	0.036	0.042	0.051	0.048	0.05	0.027	0.01	0.005	2
0.06	0.04	0.037	0.042	0.039	0.042	0.073	0.23	0.169	0.038	0.095	0.085	0.07	0.064	0.088	0.069	0.076	0.076	0.072	0.075	0.004	0.044	0.055	0.064	0.084	0.062	0.029	0.022	0.013	0.006	0.007	0.015	0.021	0.038	0.075	0.073	0.053	0.05	0.04	0.011	2
0.196	0.208	0.205	0.206	0.224	0.321	0.251	0.204	0.216	0.2	0.233	0.232	0.234	0.207	0.215	0.215	0.216	0.226	0.212	0.235	0.018	0.065	0.124	0.155	0.198	0.215	0.162	0.092	0.064	0.021	0.022	0.065	0.115	0.151	0.196	0.201	0.152	0.127	0.065	0.019	2
0.101	0.092	0.088	0.086	0.115	0.334	0.372	0.099	0.078	0.083	0.149	0.135	0.146	0.151	0.163	0.144	0.138	0.141	0.132	0.141	0.009	0.034	0.091	0.114	0.146	0.124	0.104	0.058	0.028	0.011	0.01	0.027	0.045	0.114	0.155	0.126	0.121	0.087	0.023	0.01	2
0.124	0.097	0.117	0.133	0.293	0.316	0.164	0.1	0.09	0.089	0.15	0.135	0.144	0.132	0.14	0.153	0.162	0.163	0.161	0.173	0.011	0.03	0.078	0.097	0.121	0.157	0.126	0.083	0.038	0.016	0.01	0.03	0.069	0.115	0.15	0.143	0.119	0.083	0.028	0.01	2
0.087	0.065	0.067	0.074	0.07	0.076	0.199	0.395	0.078	0.074	0.126	0.109	0.129	0.125	0.121	0.109	0.088	0.107	0.138	0.137	0.008	0.052	0.082	0.093	0.107	0.119	0.066	0.036	0.023	0.009	0.008	0.023	0.037	0.064	0.113	0.133	0.074	0.071	0.067	0.007	2
0.097	0.079	0.161	0.172	0.117	0.092	0.112	0.101	0.08	0.08	0.116	0.099	0.115	0.118	0.101	0.12	0.122	0.102	0.104	0.1	0.009	0.029	0.045	0.066	0.098	0.107	0.104	0.055	0.025	0.009	0.011	0.035	0.065	0.079	0.1	0.097	0.08	0.048	0.024	0.008	2
0.094	0.093	0.101	0.222	0.356	0.127	0.099	0.101	0.1	0.09	0.153	0.157	0.115	0.11	0.123	0.153	0.169	0.138	0.122	0.145	0.009	0.03	0.068	0.1	0.107	0.147	0.115	0.08	0.027	0.009	0.011	0.025	0.106	0.091	0.122	0.129	0.096	0.073	0.028	0.01	2
0.087	0.087	0.084	0.128	0.215	0.118	0.095	0.113	0.079	0.083	0.113	0.098	0.095	0.093	0.094	0.106	0.125	0.132	0.114	0.115	0.011	0.034	0.049	0.067	0.087	0.089	0.093	0.075	0.024	0.01	0.01	0.024	0.043	0.063	0.114	0.124	0.083	0.05	0.023	0.008	2
0.083	0.076	0.077	0.074	0.115	0.473	0.104	0.074	0.072	0.07	0.116	0.115	0.119	0.114	0.116	0.126	0.124	0.125	0.122	0.126	0.007	0.021	0.061	0.101	0.118	0.105	0.105	0.051	0.024	0.008	0.009	0.023	0.056	0.084	0.105	0.112	0.108	0.075	0.02	0.007	2
0.093	0.07	0.084	0.078	0.074	0.11	0.381	0.296	0.128	0.077	0.149	0.15	0.14	0.125	0.125	0.13	0.129	0.126	0.144	0.172	0.013	0.076	0.083	0.094	0.12	0.131	0.093	0.048	0.027	0.011	0.01	0.021	0.041	0.059	0.157	0.138	0.113	0.11	0.036	0.009	2
0.074	0.067	0.061	0.06	0.059	0.058	0.236	0.327	0.066	0.056	0.142	0.102	0.108	0.113	0.1	0.104	0.107	0.098	0.091	0.096	0.006	0.055	0.067	0.079	0.119	0.098	0.053	0.029	0.018	0.006	0.011	0.024	0.032	0.066	0.108	0.101	0.075	0.065	0.043	0.007	2
0.077	0.065	0.069	0.067	0.066	0.158	0.14	0.096	0.108	0.084	0.123	0.084	0.09	0.1	0.084	0.1	0.092	0.082	0.08	0.092	0.016	0.031	0.05	0.069	0.091	0.089	0.059	0.034	0.018	0.006	0.011	0.022	0.037	0.065	0.086	0.086	0.066	0.052	0.03	0.01	2
0.092	0.082	0.091	0.139	0.221	0.199	0.122	0.101	0.088	0.094	0.121	0.124	0.125	0.126	0.121	0.122	0.125	0.116	0.13	0.115	0.009	0.041	0.058	0.091	0.107	0.105	0.086	0.071	0.03	0.01	0.009	0.025	0.043	0.101	0.133	0.129	0.093	0.039	0.029	0.01	2
0.096	0.077	0.082	0.078	0.171	0.117	0.077	0.079	0.076	0.087	0.107	0.088	0.094	0.087	0.093	0.086	0.096	0.103	0.095	0.086	0.011	0.024	0.046	0.065	0.081	0.089	0.07	0.045	0.026	0.008	0.01	0.023	0.052	0.073	0.085	0.077	0.067	0.046	0.026	0.007	2
0.106	0.082	0.086	0.111	0.321	0.464	0.253	0.102	0.094	0.085	0.175	0.173	0.181	0.16	0.15	0.154	0.151	0.158	0.173	0.207	0.008	0.027	0.069	0.205	0.138	0.125	0.161	0.077	0.026	0.01	0.013	0.03	0.086	0.118	0.136	0.174	0.143	0.088	0.044	0.009	2
0.057	0.047	0.04	0.043	0.041	0.181	0.496	0.275	0.164	0.164	0.155	0.133	0.152	0.141	0.142	0.13	0.153	0.176	0.174	0.148	0.019	0.079	0.09	0.12	0.159	0.166	0.078	0.023	0.015	0.004	0.006	0.014	0.024	0.051	0.18	0.149	0.115	0.1	0.093	0.021	2
0.055	0.044	0.048	0.286	0.535	0.158	0.151	0.248	0.515	0.408	0.198	0.257	0.27	0.304	0.242	0.245	0.245	0.192	0.247	0.249	0.045	0.122	0.164	0.229	0.222	0.196	0.12	0.083	0.036	0.006	0.005	0.016	0.085	0.108	0.183	0.294	0.265	0.138	0.094	0.037	2
0.054	0.043	0.042	0.043	0.054	0.063	0.099	0.392	0.448	0.173	0.134	0.136	0.133	0.131	0.136	0.136	0.138	0.128	0.145	0.198	0.02	0.079	0.116	0.157	0.123	0.103	0.058	0.034	0.014	0.005	0.005	0.015	0.024	0.033	0.138	0.11	0.102	0.137	0.115	0.028	2
0.055	0.042	0.045	0.042	0.042	0.049	0.071	0.339	0.331	0.27	0.095	0.118	0.127	0.147	0.114	0.146	0.157	0.133	0.129	0.127	0.033	0.084	0.086	0.126	0.108	0.122	0.048	0.02	0.014	0.005	0.006	0.016	0.022	0.033	0.054	0.134	0.137	0.15	0.076	0.013	2
0.053	0.05	0.049	0.044	0.041	0.068	0.407	0.458	0.106	0.161	0.14	0.133	0.15	0.158	0.134	0.142	0.151	0.137	0.149	0.144	0.012	0.061	0.142	0.135	0.12	0.114	0.085	0.029	0.014	0.006	0.006	0.015	0.023	0.076	0.115	0.117	0.161	0.146	0.044	0.014	2
0.059	0.038	0.08	0.534	0.323	0.074	0.038	0.039	0.041	0.035	0.134	0.17	0.133	0.136	0.145	0.137	0.122	0.106	0.094	0.09	0.005	0.013	0.047	0.107	0.12	0.123	0.11	0.073	0.029	0.004	0.008	0.016	0.102	0.154	0.144	0.107	0.069	0.017	0.009	0.004	2
0.051	0.041	0.034	0.045	0.042	0.051	0.237	0.535	0.216	0.049	0.122	0.109	0.113	0.121	0.109	0.15	0.154	0.135	0.141	0.14	0.007	0.077	0.094	0.099	0.121	0.116	0.091	0.021	0.011	0.005	0.007	0.013	0.019	0.036	0.104	0.116	0.145	0.146	0.052	0.004	2
0.095	0.077	0.074	0.084	0.144	0.313	0.476	0.257	0.101	0.097	0.186	0.159	0.152	0.182	0.158	0.137	0.131	0.178	0.203	0.227	0.01	0.03	0.098	0.179	0.167	0.181	0.116	0.036	0.033	0.01	0.01	0.028	0.076	0.102	0.148	0.137	0.115	0.147	0.08	0.013	2
0.086	0.066	0.072	0.076	0.086	0.086	0.283	0.352	0.079	0.075	0.125	0.138	0.118	0.119	0.097	0.094	0.132	0.136	0.138	0.161	0.008	0.047	0.081	0.093	0.121	0.114	0.086	0.043	0.027	0.008	0.009	0.023	0.035	0.069	0.135	0.096	0.083	0.119	0.051	0.008	2
0.087	0.079	0.073	0.093	0.255	0.182	0.087	0.088	0.076	0.074	0.115	0.113	0.09	0.098	0.099	0.105	0.11	0.115	0.114	0.129	0.007	0.027	0.057	0.075	0.082	0.094	0.109	0.061	0.022	0.009	0.009	0.025	0.043	0.092	0.101	0.098	0.079	0.065	0.022	0.009	2
0.106	0.125	0.465	0.183	0.077	0.079	0.084	0.089	0.086	0.073	0.126	0.121	0.127	0.133	0.14	0.141	0.142	0.163	0.148	0.128	0.008	0.024	0.043	0.068	0.126	0.113	0.118	0.114	0.056	0.012	0.011	0.047	0.084	0.126	0.149	0.121	0.074	0.04	0.027	0.008	2
0.089	0.079	0.078	0.079	0.095	0.074	0.088	0.408	0.253	0.082	0.142	0.128	0.13	0.133	0.127	0.123	0.131	0.138	0.139	0.134	0.009	0.059	0.097	0.123	0.12	0.119	0.063	0.037	0.025	0.01	0.011	0.026	0.041	0.073	0.109	0.119	0.096	0.095	0.081	0.009	2
0.089	0.072	0.082	0.075	0.097	0.517	0.273	0.103	0.085	0.074	0.2	0.216	0.2	0.127	0.113	0.121	0.113	0.112	0.134	0.117	0.01	0.039	0.149	0.121	0.114	0.115	0.095	0.054	0.021	0.007	0.01	0.026	0.057	0.154	0.166	0.106	0.102	0.077	0.021	0.007	2
0.136	0.132	0.149	0.201	0.33	0.133	0.121	0.15	0.091	0.102	0.14	0.132	0.148	0.128	0.139	0.176	0.173	0.169	0.158	0.181	0.009	0.028	0.047	0.105	0.134	0.181	0.132	0.082	0.048	0.011	0.009	0.032	0.106	0.11	0.136	0.144	0.099	0.063	0.059	0.012	2
0.097	0.097	0.102	0.252	0.324	0.109	0.098	0.106	0.093	0.094	0.132	0.162	0.128	0.112	0.119	0.139	0.167	0.15	0.116	0.146	0.008	0.028	0.063	0.098	0.114	0.132	0.123	0.082	0.028	0.009	0.011	0.025	0.105	0.092	0.122	0.126	0.095	0.072	0.028	0.01	2
0.091	0.079	0.083	0.101	0.103	0.271	0.287	0.132	0.099	0.104	0.146	0.124	0.157	0.124	0.112	0.118	0.126	0.163	0.153	0.119	0.009	0.054	0.079	0.099	0.105	0.149	0.095	0.045	0.028	0.011	0.008	0.027	0.041	0.09	0.156	0.109	0.107	0.087	0.037	0.011	2
0.09	0.075	0.075	0.078	0.077	0.212	0.208	0.097	0.09	0.081	0.12	0.108	0.101	0.093	0.101	0.101	0.106	0.111	0.112	0.126	0.011	0.037	0.064	0.07	0.081	0.102	0.101	0.038	0.023	0.01	0.012	0.023	0.039	0.064	0.109	0.102	0.083	0.066	0.033	0.007	2
0.173	0.192	0.196	0.232	0.292	0.237	0.193	0.159	0.121	0.099	0.227	0.196	0.2	0.201	0.2	0.194	0.161	0.165	0.156	0.182	0.014	0.039	0.096	0.146	0.162	0.169	0.14	0.119	0.044	0.014	0.015	0.061	0.117	0.173	0.2	0.136	0.122	0.07	0.036	0.015	2
0.061	0.051	0.053	0.054	0.226	0.399	0.102	0.044	0.047	0.046	0.109	0.114	0.1	0.115	0.116	0.108	0.097	0.102	0.101	0.11	0.005	0.014	0.046	0.088	0.146	0.091	0.082	0.033	0.02	0.009	0.007	0.016	0.058	0.097	0.089	0.097	0.088	0.063	0.014	0.005	2
0.077	0.058	0.052	0.185	0.353	0.174	0.047	0.046	0.047	0.041	0.119	0.102	0.125	0.105	0.102	0.116	0.121	0.086	0.092	0.103	0.006	0.013	0.056	0.076	0.079	0.123	0.1	0.059	0.018	0.006	0.009	0.021	0.05	0.136	0.099	0.088	0.069	0.046	0.013	0.004	2
0.061	0.052	0.058	0.056	0.052	0.05	0.43	0.161	0.046	0.051	0.107	0.082	0.12	0.091	0.091	0.1	0.104	0.099	0.109	0.116	0.006	0.028	0.065	0.078	0.097	0.124	0.073	0.02	0.012	0.005	0.005	0.02	0.042	0.064	0.078	0.078	0.092	0.073	0.048	0.006	2
0.066	0.059	0.057	0.048	0.284	0.321	0.054	0.047	0.063	0.077	0.119	0.085	0.123	0.093	0.092	0.102	0.109	0.112	0.105	0.115	0.01	0.021	0.048	0.084	0.09	0.1	0.116	0.046	0.011	0.005	0.008	0.026	0.055	0.073	0.079	0.103	0.091	0.07	0.018	0.005	2
0.073	0.068	0.068	0.066	0.059	0.056	0.119	0.259	0.104	0.045	0.092	0.063	0.086	0.093	0.098	0.073	0.12	0.098	0.093	0.091	0.012	0.03	0.04	0.062	0.092	0.098	0.064	0.033	0.018	0.005	0.01	0.023	0.029	0.038	0.079	0.095	0.075	0.056	0.04	0.006	2
0.06	0.052	0.047	0.055	0.136	0.533	0.602	0.447	0.116	0.07	0.181	0.181	0.201	0.249	0.261	0.271	0.22	0.189	0.175	0.171	0.008	0.082	0.159	0.192	0.204	0.183	0.152	0.047	0.015	0.006	0.006	0.015	0.029	0.096	0.231	0.26	0.237	0.136	0.03	0.006	2
0.058	0.044	0.049	0.056	0.244	0.388	0.052	0.044	0.046	0.045	0.085	0.094	0.1	0.095	0.097	0.093	0.094	0.104	0.112	0.126	0.006	0.015	0.044	0.079	0.085	0.092	0.1	0.054	0.017	0.006	0.007	0.016	0.031	0.079	0.103	0.094	0.08	0.071	0.014	0.005	2
0.058	0.049	0.099	0.065	0.112	0.251	0.32	0.101	0.04	0.039	0.103	0.139	0.168	0.106	0.105	0.118	0.126	0.104	0.067	0.088	0.004	0.035	0.079	0.087	0.118	0.108	0.063	0.047	0.014	0.005	0.006	0.018	0.058	0.065	0.123	0.139	0.101	0.036	0.011	0.004	2
0.229	0.191	0.201	0.219	0.328	0.337	0.207	0.194	0.229	0.289	0.217	0.208	0.219	0.261	0.41	0.319	0.212	0.183	0.196	0.203	0.022	0.067	0.137	0.216	0.189	0.218	0.2	0.085	0.057	0.021	0.016	0.057	0.137	0.171	0.212	0.203	0.206	0.139	0.054	0.016	2
0.106	0.092	0.103	0.307	0.348	0.11	0.088	0.083	0.097	0.1	0.155	0.139	0.126	0.137	0.146	0.137	0.131	0.158	0.151	0.143	0.01	0.023	0.04	0.098	0.168	0.147	0.109	0.074	0.032	0.012	0.013	0.046	0.079	0.109	0.135	0.121	0.106	0.053	0.037	0.013	2
0.138	0.129	0.113	0.103	0.13	0.27	0.311	0.361	0.18	0.134	0.153	0.16	0.136	0.143	0.173	0.171	0.202	0.258	0.26	0.211	0.012	0.074	0.098	0.108	0.15	0.187	0.166	0.084	0.039	0.015	0.009	0.036	0.058	0.087	0.149	0.144	0.211	0.167	0.061	0.009	2
0.167	0.159	0.11	0.102	0.238	0.243	0.238	0.108	0.096	0.114	0.139	0.14	0.128	0.125	0.12	0.15	0.162	0.213	0.205	0.192	0.009	0.032	0.069	0.106	0.13	0.158	0.098	0.084	0.071	0.025	0.012	0.027	0.06	0.131	0.156	0.136	0.106	0.098	0.048	0.011	2
0.162	0.146	0.11	0.094	0.206	0.297	0.214	0.114	0.087	0.106	0.141	0.125	0.141	0.127	0.122	0.13	0.148	0.175	0.216	0.203	0.008	0.029	0.078	0.101	0.113	0.169	0.096	0.067	0.07	0.033	0.01	0.029	0.054	0.115	0.161	0.139	0.104	0.09	0.051	0.01	2
0.455	0.428	0.529	0.454	0.378	0.355	0.381	0.377	0.417	0.388	0.442	0.399	0.442	0.409	0.425	0.427	0.412	0.414	0.385	0.407	0.038	0.114	0.195	0.29	0.384	0.384	0.304	0.202	0.13	0.051	0.043	0.148	0.229	0.322	0.367	0.36	0.261	0.182	0.128	0.044	2
0.365	0.332	0.349	0.313	0.386	0.497	0.496	0.415	0.445	0.332	0.402	0.406	0.407	0.393	0.419	0.396	0.397	0.379	0.354	0.361	0.035	0.133	0.218	0.289	0.366	0.361	0.262	0.179	0.088	0.032	0.037	0.131	0.167	0.259	0.349	0.366	0.314	0.206	0.104	0.031	2
0.512	0.515	0.731	0.55	0.472	0.451	0.484	0.441	0.419	0.458	0.484	0.497	0.503	0.483	0.498	0.45	0.532	0.518	0.537	0.532	0.054	0.123	0.204	0.317	0.467	0.457	0.396	0.295	0.172	0.044	0.05	0.172	0.279	0.369	0.432	0.468	0.321	0.245	0.147	0.047	2
0.432	0.452	0.73	0.819	0.418	0.375	0.398	0.434	0.402	0.417	0.534	0.493	0.457	0.458	0.473	0.448	0.445	0.484	0.533	0.545	0.052	0.113	0.232	0.303	0.449	0.425	0.347	0.269	0.195	0.057	0.048	0.151	0.256	0.384	0.476	0.461	0.299	0.188	0.133	0.054	2
0.414	0.384	0.384	0.416	0.422	0.498	0.628	0.793	0.492	0.388	0.438	0.455	0.492	0.5	0.526	0.518	0.438	0.477	0.5	0.469	0.032	0.146	0.281	0.363	0.464	0.443	0.345	0.18	0.11	0.046	0.046	0.117	0.207	0.327	0.411	0.438	0.354	0.316	0.149	0.045	2
0.071	0.056	0.06	0.253	0.669	0.237	0.153	0.057	0.061	0.051	0.159	0.237	0.166	0.151	0.156	0.141	0.155	0.164	0.168	0.157	0.005	0.027	0.103	0.111	0.145	0.16	0.138	0.11	0.02	0.005	0.008	0.024	0.041	0.252	0.139	0.142	0.147	0.048	0.018	0.006	2
0.068	0.064	0.052	0.068	0.428	0.494	0.254	0.123	0.051	0.06	0.153	0.165	0.231	0.157	0.159	0.145	0.146	0.159	0.165	0.166	0.004	0.052	0.112	0.113	0.137	0.162	0.138	0.08	0.019	0.006	0.007	0.023	0.032	0.13	0.249	0.135	0.141	0.082	0.019	0.008	2
0.082	0.058	0.057	0.063	0.288	0.574	0.127	0.057	0.057	0.051	0.166	0.148	0.154	0.143	0.15	0.148	0.141	0.123	0.116	0.102	0.006	0.024	0.099	0.13	0.124	0.117	0.093	0.073	0.019	0.006	0.008	0.017	0.054	0.144	0.148	0.152	0.122	0.034	0.015	0.004	2
0.079	0.07	0.06	0.057	0.06	0.146	0.606	0.262	0.06	0.059	0.165	0.157	0.15	0.151	0.143	0.157	0.15	0.141	0.122	0.121	0.008	0.064	0.116	0.13	0.126	0.114	0.096	0.045	0.019	0.008	0.008	0.019	0.027	0.101	0.161	0.146	0.141	0.103	0.016	0.005	2
0.1	0.079	0.082	0.084	0.084	0.449	0.507	0.131	0.089	0.083	0.183	0.197	0.196	0.184	0.168	0.162	0.152	0.146	0.143	0.137	0.009	0.05	0.122	0.163	0.159	0.137	0.111	0.049	0.025	0.01	0.012	0.025	0.044	0.152	0.186	0.154	0.131	0.1	0.025	0.008	2
0.606	0.683	0.654	0.653	0.644	0.664	0.605	0.514	0.54	0.52	0.533	0.523	0.623	0.69	0.668	0.691	0.647	0.66	0.525	0.53	0.081	0.215	0.27	0.41	0.479	0.499	0.416	0.351	0.245	0.079	0.05	0.148	0.215	0.454	0.672	0.784	0.399	0.215	0.098	0.022	3
0.511	0.493	0.494	0.644	0.687	0.584	0.647	0.626	0.634	0.622	0.513	0.559	0.597	0.62	0.713	0.665	0.671	0.591	0.566	0.452	0.078	0.215	0.33	0.452	0.521	0.479	0.366	0.275	0.191	0.071	0.055	0.114	0.223	0.344	0.601	0.725	0.544	0.231	0.119	0.027	3
0.439	0.541	0.52	0.558	0.5	0.456	0.39	0.396	0.403	0.507	0.512	0.527	0.538	0.602	0.533	0.481	0.446	0.375	0.395	0.306	0.084	0.185	0.281	0.332	0.364	0.357	0.284	0.243	0.169	0.061	0.032	0.143	0.196	0.336	0.652	0.542	0.266	0.112	0.063	0.023	3
0.547	0.605	0.579	0.507	0.418	0.41	0.397	0.388	0.418	0.402	0.447	0.471	0.487	0.472	0.513	0.48	0.449	0.486	0.449	0.42	0.085	0.163	0.227	0.293	0.332	0.327	0.307	0.299	0.218	0.091	0.051	0.113	0.197	0.264	0.638	0.639	0.251	0.119	0.067	0.015	3
0.395	0.43	0.556	0.562	0.561	0.601	0.631	0.523	0.387	0.376	0.349	0.396	0.526	0.513	0.566	0.529	0.579	0.588	0.513	0.462	0.046	0.145	0.234	0.343	0.431	0.446	0.358	0.248	0.177	0.083	0.036	0.092	0.18	0.291	0.434	0.777	0.421	0.185	0.079	0.019	3
0.479	0.52	0.602	0.659	0.661	0.681	0.683	0.666	0.572	0.525	0.634	0.684	0.643	0.655	0.657	0.673	0.592	0.501	0.512	0.492	0.044	0.147	0.229	0.515	0.705	0.713	0.36	0.208	0.088	0.022	0.08	0.226	0.362	0.412	0.496	0.471	0.41	0.273	0.207	0.085	3
0.279	0.426	0.568	0.583	0.662	0.671	0.71	0.636	0.599	0.573	0.486	0.477	0.49	0.633	0.671	0.558	0.61	0.597	0.587	0.584	0.041	0.125	0.235	0.388	0.713	0.645	0.408	0.182	0.085	0.033	0.037	0.162	0.268	0.327	0.461	0.479	0.453	0.353	0.222	0.09	3
0.32	0.361	0.479	0.512	0.63	0.575	0.572	0.588	0.542	0.486	0.545	0.52	0.562	0.541	0.455	0.44	0.417	0.477	0.597	0.502	0.046	0.142	0.223	0.31	0.616	0.615	0.35	0.157	0.057	0.019	0.068	0.185	0.25	0.292	0.398	0.408	0.349	0.291	0.212	0.08	3
0.3	0.382	0.456	0.476	0.431	0.501	0.492	0.475	0.494	0.412	0.45	0.401	0.423	0.452	0.483	0.512	0.504	0.454	0.39	0.343	0.041	0.106	0.174	0.231	0.634	0.564	0.252	0.123	0.063	0.026	0.053	0.152	0.231	0.295	0.357	0.331	0.315	0.238	0.188	0.051	3
0.368	0.402	0.44	0.453	0.47	0.5	0.515	0.47	0.501	0.478	0.579	0.584	0.48	0.425	0.398	0.394	0.404	0.419	0.469	0.441	0.055	0.112	0.18	0.274	0.714	0.512	0.244	0.123	0.071	0.02	0.093	0.212	0.237	0.264	0.325	0.36	0.299	0.242	0.188	0.083	3
0.33	0.457	0.539	0.55	0.509	0.538	0.52	0.546	0.48	0.417	0.547	0.559	0.566	0.606	0.632	0.521	0.388	0.374	0.359	0.331	0.036	0.115	0.224	0.316	0.746	0.57	0.242	0.123	0.056	0.014	0.071	0.186	0.302	0.382	0.421	0.368	0.27	0.202	0.158	0.079	3
0.348	0.444	0.513	0.517	0.566	0.558	0.574	0.572	0.524	0.449	0.376	0.423	0.6	0.589	0.604	0.527	0.604	0.539	0.385	0.417	0.019	0.078	0.184	0.435	0.778	0.458	0.282	0.182	0.089	0.037	0.048	0.146	0.249	0.376	0.432	0.442	0.336	0.239	0.183	0.087	3
0.411	0.384	0.468	0.511	0.472	0.507	0.491	0.493	0.436	0.401	0.469	0.515	0.465	0.477	0.407	0.425	0.408	0.459	0.462	0.487	0.027	0.082	0.177	0.374	0.691	0.34	0.238	0.175	0.136	0.052	0.054	0.163	0.251	0.313	0.369	0.396	0.293	0.204	0.162	0.082	3
0.503	0.522	0.546	0.545	0.611	0.545	0.484	0.442	0.369	0.373	0.563	0.487	0.405	0.422	0.445	0.521	0.569	0.55	0.527	0.452	0.024	0.063	0.146	0.333	0.61	0.622	0.294	0.216	0.143	0.032	0.087	0.194	0.285	0.356	0.401	0.353	0.312	0.233	0.18	0.074	3
0.575	0.629	0.638	0.644	0.576	0.649	0.489	0.351	0.245	0.219	0.473	0.521	0.502	0.601	0.507	0.413	0.442	0.442	0.544	0.556	0.02	0.056	0.11	0.289	0.527	0.654	0.441	0.229	0.137	0.043	0.094	0.245	0.329	0.36	0.393	0.381	0.303	0.211	0.153	0.033	3
0.115	0.186	0.157	0.173	0.165	0.112	0.122	0.106	0.085	0.075	0.095	0.119	0.123	0.079	0.09	0.112	0.152	0.168	0.182	0.175	0.011	0.034	0.063	0.069	0.076	0.097	0.089	0.098	0.075	0.036	0.009	0.024	0.039	0.058	0.141	0.253	0.054	0.039	0.021	0.007	3
0.139	0.207	0.15	0.162	0.16	0.156	0.126	0.181	0.161	0.157	0.145	0.179	0.179	0.153	0.151	0.16	0.173	0.176	0.125	0.158	0.046	0.074	0.089	0.079	0.107	0.108	0.096	0.086	0.065	0.047	0.008	0.022	0.038	0.053	0.294	0.283	0.052	0.037	0.018	0.006	3
0.091	0.138	0.164	0.221	0.194	0.151	0.16	0.155	0.15	0.097	0.162	0.148	0.154	0.178	0.161	0.137	0.163	0.135	0.148	0.131	0.03	0.066	0.079	0.096	0.112	0.105	0.11	0.076	0.059	0.023	0.008	0.024	0.039	0.05	0.32	0.21	0.047	0.033	0.018	0.008	3
0.15	0.163	0.153	0.139	0.162	0.152	0.143	0.167	0.19	0.087	0.175	0.143	0.144	0.132	0.138	0.159	0.154	0.152	0.158	0.148	0.035	0.073	0.076	0.083	0.103	0.106	0.085	0.077	0.07	0.043	0.009	0.024	0.037	0.048	0.267	0.272	0.047	0.031	0.02	0.007	3
0.128	0.232	0.162	0.161	0.184	0.163	0.138	0.156	0.141	0.078	0.173	0.151	0.179	0.177	0.16	0.148	0.115	0.136	0.14	0.158	0.031	0.068	0.074	0.099	0.106	0.111	0.086	0.071	0.078	0.044	0.008	0.02	0.033	0.072	0.414	0.122	0.043	0.031	0.02	0.006	3
0.167	0.142	0.144	0.107	0.145	0.158	0.173	0.181	0.155	0.16	0.11	0.233	0.167	0.156	0.188	0.166	0.139	0.151	0.145	0.081	0.007	0.017	0.032	0.065	0.411	0.129	0.045	0.031	0.02	0.007	0.04	0.08	0.076	0.086	0.108	0.106	0.096	0.073	0.068	0.033	3
0.179	0.125	0.131	0.167	0.169	0.18	0.195	0.212	0.179	0.151	0.118	0.183	0.17	0.159	0.21	0.205	0.174	0.153	0.161	0.154	0.007	0.021	0.034	0.049	0.389	0.233	0.052	0.033	0.021	0.007	0.039	0.069	0.082	0.09	0.127	0.117	0.111	0.085	0.07	0.052	3
0.183	0.182	0.137	0.188	0.176	0.149	0.135	0.15	0.159	0.108	0.11	0.157	0.176	0.131	0.179	0.169	0.17	0.15	0.156	0.173	0.008	0.02	0.039	0.051	0.08	0.459	0.056	0.036	0.021	0.008	0.037	0.075	0.079	0.094	0.121	0.11	0.09	0.072	0.066	0.039	3
0.184	0.163	0.135	0.208	0.197	0.177	0.167	0.16	0.174	0.158	0.171	0.251	0.174	0.168	0.176	0.184	0.175	0.161	0.125	0.139	0.011	0.024	0.04	0.055	0.442	0.172	0.053	0.039	0.023	0.008	0.056	0.085	0.083	0.109	0.121	0.12	0.101	0.092	0.053	0.042	3
0.151	0.107	0.091	0.091	0.114	0.109	0.151	0.126	0.139	0.077	0.135	0.126	0.1	0.103	0.107	0.113	0.125	0.102	0.135	0.11	0.009	0.023	0.036	0.045	0.165	0.188	0.049	0.036	0.02	0.008	0.039	0.048	0.047	0.061	0.09	0.082	0.083	0.055	0.053	0.019	3
0.172	0.133	0.177	0.175	0.137	0.175	0.202	0.186	0.165	0.154	0.104	0.164	0.22	0.254	0.176	0.168	0.174	0.18	0.149	0.086	0.008	0.022	0.035	0.064	0.392	0.192	0.053	0.035	0.022	0.009	0.029	0.068	0.099	0.121	0.107	0.127	0.101	0.088	0.07	0.026	3
0.184	0.168	0.191	0.196	0.186	0.161	0.169	0.114	0.1	0.081	0.143	0.133	0.17	0.2	0.168	0.183	0.191	0.165	0.111	0.086	0.008	0.023	0.039	0.058	0.127	0.378	0.064	0.046	0.021	0.01	0.047	0.05	0.095	0.112	0.146	0.114	0.092	0.066	0.034	0.015	3
0.139	0.134	0.104	0.094	0.089	0.116	0.108	0.153	0.133	0.126	0.134	0.169	0.096	0.1	0.115	0.097	0.134	0.101	0.131	0.117	0.01	0.024	0.033	0.049	0.233	0.133	0.048	0.035	0.022	0.008	0.031	0.07	0.051	0.062	0.079	0.083	0.08	0.059	0.049	0.033	3
0.218	0.17	0.165	0.148	0.166	0.168	0.152	0.221	0.272	0.169	0.211	0.21	0.216	0.222	0.2	0.256	0.249	0.115	0.089	0.092	0.031	0.068	0.094	0.202	0.162	0.132	0.087	0.09	0.053	0.008	0.016	0.035	0.053	0.27	0.234	0.065	0.095	0.091	0.034	0.026	3
0.094	0.103	0.17	0.302	0.216	0.22	0.157	0.189	0.195	0.183	0.205	0.199	0.17	0.248	0.172	0.111	0.155	0.183	0.21	0.17	0.012	0.029	0.058	0.108	0.342	0.233	0.06	0.041	0.025	0.01	0.014	0.076	0.095	0.162	0.133	0.108	0.091	0.102	0.078	0.052	3
0.204	0.212	0.163	0.132	0.126	0.254	0.19	0.183	0.193	0.233	0.114	0.158	0.245	0.276	0.224	0.199	0.182	0.182	0.189	0.125	0.033	0.086	0.098	0.162	0.143	0.108	0.091	0.102	0.085	0.036	0.01	0.026	0.046	0.064	0.33	0.283	0.088	0.054	0.028	0.014	3
0.199	0.174	0.177	0.29	0.306	0.302	0.237	0.195	0.263	0.248	0.236	0.242	0.231	0.216	0.227	0.232	0.233	0.279	0.25	0.239	0.017	0.033	0.061	0.101	0.419	0.374	0.098	0.055	0.033	0.011	0.058	0.078	0.119	0.147	0.165	0.168	0.149	0.135	0.109	0.066	3
0.211	0.282	0.235	0.217	0.404	0.381	0.28	0.31	0.21	0.173	0.245	0.274	0.287	0.277	0.264	0.234	0.27	0.31	0.25	0.281	0.017	0.047	0.072	0.11	0.372	0.467	0.139	0.064	0.051	0.013	0.059	0.1	0.138	0.153	0.207	0.207	0.2	0.139	0.115	0.031	3
0.185	0.395	0.359	0.282	0.346	0.304	0.29	0.306	0.206	0.161	0.255	0.25	0.244	0.288	0.326	0.285	0.281	0.32	0.319	0.26	0.015	0.041	0.082	0.123	0.24	0.521	0.267	0.069	0.045	0.012	0.05	0.128	0.146	0.194	0.189	0.208	0.194	0.181	0.099	0.023	3
0.138	0.135	0.274	0.297	0.321	0.366	0.299	0.293	0.29	0.311	0.309	0.331	0.273	0.327	0.266	0.274	0.335	0.22	0.18	0.195	0.016	0.047	0.101	0.431	0.374	0.14	0.115	0.085	0.044	0.013	0.015	0.106	0.145	0.194	0.218	0.207	0.186	0.158	0.102	0.03	3
0.287	0.278	0.289	0.305	0.326	0.309	0.337	0.305	0.255	0.229	0.275	0.35	0.362	0.303	0.324	0.315	0.236	0.285	0.25	0.222	0.029	0.061	0.108	0.127	0.428	0.425	0.145	0.076	0.044	0.025	0.057	0.119	0.157	0.222	0.232	0.218	0.188	0.14	0.094	0.034	3
0.143	0.187	0.24	0.309	0.328	0.312	0.305	0.29	0.303	0.324	0.33	0.28	0.332	0.261	0.297	0.353	0.276	0.247	0.204	0.16	0.02	0.056	0.093	0.452	0.346	0.137	0.121	0.088	0.046	0.016	0.022	0.09	0.161	0.19	0.21	0.224	0.188	0.16	0.107	0.017	3
0.327	0.297	0.294	0.297	0.309	0.337	0.328	0.306	0.197	0.194	0.177	0.245	0.281	0.307	0.356	0.357	0.301	0.315	0.322	0.237	0.018	0.048	0.117	0.147	0.159	0.474	0.324	0.088	0.055	0.021	0.028	0.105	0.158	0.201	0.232	0.257	0.195	0.146	0.102	0.021	3
0.166	0.28	0.309	0.237	0.194	0.279	0.435	0.304	0.2	0.165	0.234	0.238	0.228	0.261	0.284	0.27	0.258	0.23	0.264	0.293	0.016	0.042	0.067	0.093	0.364	0.444	0.15	0.059	0.038	0.012	0.048	0.102	0.127	0.151	0.191	0.177	0.178	0.147	0.125	0.032	3
0.336	0.29	0.276	0.256	0.343	0.259	0.214	0.225	0.256	0.221	0.207	0.298	0.261	0.3	0.342	0.333	0.289	0.249	0.236	0.166	0.047	0.092	0.135	0.162	0.187	0.215	0.201	0.164	0.109	0.024	0.016	0.051	0.095	0.25	0.401	0.248	0.162	0.063	0.041	0.017	3
0.296	0.303	0.331	0.377	0.427	0.389	0.318	0.379	0.332	0.248	0.368	0.362	0.355	0.333	0.347	0.306	0.361	0.345	0.342	0.267	0.058	0.137	0.195	0.237	0.256	0.245	0.206	0.179	0.123	0.063	0.022	0.058	0.091	0.214	0.59	0.404	0.16	0.081	0.063	0.022	3
0.323	0.324	0.358	0.377	0.383	0.306	0.324	0.334	0.288	0.251	0.261	0.356	0.445	0.432	0.338	0.365	0.326	0.372	0.24	0.144	0.063	0.121	0.172	0.228	0.259	0.262	0.205	0.177	0.118	0.031	0.02	0.071	0.1	0.222	0.599	0.377	0.127	0.062	0.047	0.013	3
0.35	0.402	0.364	0.276	0.306	0.351	0.362	0.397	0.285	0.268	0.378	0.382	0.343	0.328	0.382	0.403	0.311	0.323	0.303	0.214	0.073	0.154	0.195	0.201	0.257	0.224	0.187	0.167	0.164	0.058	0.018	0.069	0.105	0.205	0.628	0.426	0.108	0.074	0.042	0.012	3
0.253	0.305	0.342	0.314	0.311	0.304	0.263	0.26	0.284	0.296	0.259	0.399	0.508	0.37	0.229	0.222	0.247	0.302	0.255	0.135	0.075	0.147	0.168	0.202	0.198	0.205	0.188	0.139	0.124	0.024	0.015	0.047	0.08	0.31	0.516	0.273	0.122	0.058	0.039	0.012	3
0.259	0.29	0.327	0.327	0.321	0.305	0.285	0.245	0.277	0.302	0.196	0.309	0.494	0.44	0.265	0.211	0.246	0.281	0.324	0.179	0.053	0.14	0.166	0.205	0.204	0.2	0.188	0.142	0.124	0.045	0.014	0.049	0.074	0.197	0.524	0.37	0.12	0.081	0.034	0.013	3
0.301	0.281	0.329	0.323	0.408	0.325	0.242	0.257	0.213	0.154	0.447	0.363	0.367	0.321	0.393	0.317	0.174	0.154	0.159	0.135	0.03	0.112	0.194	0.216	0.223	0.245	0.182	0.142	0.055	0.018	0.02	0.058	0.207	0.482	0.282	0.151	0.09	0.073	0.041	0.016	3
0.218	0.286	0.249	0.323	0.399	0.362	0.318	0.35	0.357	0.308	0.189	0.2	0.22	0.273	0.393	0.459	0.384	0.36	0.33	0.369	0.022	0.092	0.167	0.205	0.255	0.273	0.241	0.182	0.118	0.034	0.019	0.065	0.09	0.135	0.192	0.375	0.504	0.155	0.046	0.014	3
0.311	0.333	0.387	0.325	0.262	0.185	0.226	0.239	0.171	0.149	0.34	0.338	0.308	0.34	0.313	0.283	0.182	0.162	0.166	0.162	0.016	0.06	0.121	0.217	0.237	0.259	0.206	0.121	0.05	0.014	0.017	0.095	0.338	0.24	0.176	0.138	0.128	0.099	0.049	0.014	3
0.225	0.25	0.18	0.259	0.298	0.417	0.398	0.362	0.356	0.366	0.211	0.203	0.3	0.325	0.359	0.337	0.345	0.336	0.335	0.353	0.019	0.099	0.178	0.25	0.262	0.26	0.227	0.157	0.081	0.023	0.017	0.077	0.128	0.137	0.167	0.255	0.458	0.23	0.067	0.019	3
0.211	0.242	0.178	0.24	0.319	0.364	0.32	0.374	0.363	0.307	0.174	0.18	0.197	0.198	0.248	0.329	0.451	0.431	0.347	0.362	0.014	0.071	0.141	0.207	0.226	0.263	0.26	0.182	0.077	0.019	0.02	0.057	0.088	0.137	0.177	0.207	0.372	0.308	0.079	0.014	3
0.32	0.32	0.395	0.412	0.396	0.413	0.424	0.491	0.545	0.493	0.351	0.319	0.329	0.357	0.433	0.512	0.443	0.48	0.459	0.533	0.06	0.144	0.211	0.3	0.349	0.338	0.278	0.219	0.154	0.056	0.018	0.057	0.124	0.2	0.465	0.546	0.278	0.193	0.155	0.074	3
0.439	0.414	0.466	0.45	0.449	0.417	0.379	0.432	0.544	0.579	0.445	0.471	0.487	0.457	0.482	0.45	0.442	0.454	0.45	0.434	0.046	0.11	0.234	0.348	0.462	0.447	0.317	0.199	0.094	0.029	0.053	0.124	0.334	0.323	0.283	0.308	0.339	0.286	0.175	0.063	3
0.315	0.377	0.437	0.355	0.374	0.427	0.415	0.419	0.412	0.411	0.19	0.246	0.365	0.416	0.516	0.435	0.42	0.439	0.481	0.438	0.032	0.122	0.161	0.235	0.341	0.365	0.321	0.236	0.115	0.043	0.018	0.074	0.16	0.23	0.292	0.368	0.477	0.238	0.084	0.036	3
0.407	0.415	0.44	0.383	0.394	0.38	0.364	0.285	0.225	0.231	0.43	0.421	0.375	0.336	0.339	0.374	0.392	0.335	0.267	0.261	0.034	0.106	0.171	0.218	0.311	0.327	0.25	0.201	0.116	0.031	0.032	0.109	0.181	0.496	0.287	0.253	0.202	0.107	0.078	0.021	3
0.325	0.328	0.388	0.455	0.46	0.418	0.391	0.341	0.384	0.329	0.332	0.368	0.395	0.368	0.441	0.407	0.374	0.343	0.377	0.414	0.034	0.11	0.194	0.266	0.34	0.346	0.261	0.19	0.131	0.04	0.038	0.108	0.182	0.21	0.322	0.404	0.407	0.14	0.08	0.026	3
0.397	0.391	0.402	0.393	0.371	0.315	0.322	0.316	0.247	0.244	0.38	0.353	0.342	0.385	0.441	0.372	0.276	0.262	0.262	0.328	0.03	0.066	0.153	0.255	0.328	0.319	0.25	0.18	0.082	0.038	0.031	0.094	0.306	0.316	0.264	0.264	0.178	0.118	0.081	0.049	3
0.471	0.402	0.433	0.481	0.475	0.557	0.493	0.38	0.373	0.322	0.41	0.362	0.386	0.411	0.454	0.452	0.483	0.493	0.468	0.458	0.036	0.108	0.203	0.252	0.292	0.431	0.549	0.179	0.103	0.042	0.032	0.125	0.241	0.327	0.369	0.373	0.319	0.239	0.133	0.033	3
0.485	0.475	0.41	0.386	0.457	0.463	0.46	0.44	0.419	0.462	0.522	0.5	0.521	0.532	0.452	0.405	0.416	0.36	0.373	0.382	0.04	0.151	0.351	0.274	0.398	0.332	0.284	0.234	0.128	0.039	0.045	0.141	0.258	0.367	0.409	0.391	0.298	0.196	0.103	0.034	3
0.483	0.47	0.544	0.564	0.57	0.535	0.516	0.482	0.529	0.524	0.53	0.533	0.515	0.55	0.567	0.522	0.551	0.54	0.505	0.426	0.042	0.117	0.199	0.454	0.658	0.403	0.345	0.228	0.136	0.038	0.077	0.169	0.255	0.373	0.465	0.45	0.331	0.259	0.174	0.063	3
0.462	0.496	0.511	0.474	0.449	0.394	0.39	0.437	0.447	0.426	0.336	0.413	0.412	0.404	0.468	0.49	0.48	0.504	0.513	0.47	0.028	0.118	0.158	0.231	0.379	0.643	0.317	0.232	0.113	0.039	0.061	0.145	0.222	0.281	0.371	0.395	0.321	0.225	0.158	0.074	3
0.554	0.556	0.578	0.546	0.594	0.552	0.567	0.615	0.577	0.619	0.586	0.599	0.591	0.575	0.611	0.567	0.579	0.59	0.565	0.495	0.057	0.166	0.267	0.376	0.682	0.562	0.343	0.239	0.149	0.051	0.08	0.196	0.282	0.388	0.49	0.496	0.406	0.302	0.178	0.072	3
0.514	0.509	0.482	0.477	0.527	0.526	0.571	0.538	0.557	0.596	0.564	0.57	0.602	0.553	0.562	0.574	0.498	0.475	0.455	0.44	0.056	0.153	0.39	0.412	0.428	0.434	0.347	0.236	0.15	0.043	0.056	0.15	0.27	0.391	0.492	0.478	0.373	0.259	0.134	0.051	3
0.557	0.545	0.513	0.525	0.536	0.528	0.586	0.521	0.545	0.515	0.459	0.408	0.407	0.549	0.596	0.608	0.575	0.611	0.581	0.581	0.04	0.155	0.239	0.337	0.436	0.47	0.545	0.279	0.144	0.053	0.056	0.123	0.247	0.375	0.478	0.458	0.398	0.321	0.179	0.058	3
0.47	0.458	0.483	0.513	0.552	0.565	0.566	0.593	0.57	0.56	0.602	0.564	0.586	0.562	0.581	0.478	0.445	0.513	0.484	0.509	0.051	0.16	0.349	0.461	0.452	0.453	0.339	0.222	0.138	0.05	0.043	0.167	0.277	0.385	0.48	0.465	0.368	0.271	0.165	0.056	3
0.364	0.356	0.437	0.413	0.442	0.477	0.434	0.476	0.535	0.519	0.422	0.486	0.456	0.421	0.483	0.452	0.444	0.465	0.41	0.417	0.062	0.165	0.26	0.335	0.383	0.368	0.285	0.208	0.138	0.031	0.036	0.119	0.192	0.262	0.362	0.544	0.323	0.239	0.121	0.037	3
0.359	0.359	0.378	0.406	0.419	0.413	0.424	0.479	0.466	0.492	0.37	0.333	0.4	0.396	0.394	0.386	0.398	0.445	0.529	0.54	0.042	0.15	0.195	0.294	0.378	0.358	0.273	0.199	0.164	0.051	0.036	0.085	0.18	0.242	0.305	0.418	0.416	0.206	0.171	0.045	3
0.416	0.445	0.494	0.469	0.489	0.478	0.427	0.501	0.47	0.481	0.473	0.44	0.482	0.435	0.416	0.455	0.463	0.469	0.538	0.501	0.059	0.152	0.227	0.315	0.389	0.426	0.334	0.224	0.16	0.054	0.037	0.112	0.185	0.428	0.383	0.434	0.338	0.21	0.16	0.056	3
0.54	0.514	0.541	0.492	0.478	0.496	0.516	0.535	0.546	0.517	0.49	0.477	0.465	0.513	0.568	0.563	0.564	0.542	0.524	0.466	0.048	0.152	0.261	0.351	0.462	0.469	0.378	0.264	0.159	0.049	0.045	0.14	0.21	0.407	0.553	0.435	0.312	0.248	0.18	0.06	3
0.511	0.5	0.463	0.503	0.562	0.508	0.485	0.488	0.523	0.487	0.422	0.486	0.47	0.466	0.479	0.465	0.538	0.569	0.585	0.535	0.047	0.141	0.254	0.326	0.412	0.462	0.366	0.277	0.166	0.065	0.046	0.142	0.228	0.327	0.407	0.496	0.371	0.331	0.125	0.041	3
0.543	0.547	0.595	0.554	0.497	0.542	0.464	0.45	0.474	0.464	0.598	0.587	0.505	0.453	0.437	0.457	0.465	0.546	0.508	0.567	0.054	0.152	0.252	0.36	0.43	0.458	0.339	0.284	0.179	0.061	0.058	0.166	0.25	0.414	0.554	0.378	0.304	0.237	0.148	0.061	3
0.483	0.565	0.529	0.541	0.508	0.571	0.522	0.532	0.553	0.475	0.529	0.473	0.509	0.498	0.481	0.551	0.587	0.612	0.551	0.482	0.05	0.136	0.245	0.385	0.46	0.511	0.388	0.266	0.155	0.051	0.053	0.177	0.263	0.333	0.459	0.441	0.409	0.326	0.143	0.042	3
0.458	0.409	0.373	0.36	0.372	0.338	0.404	0.404	0.402	0.391	0.448	0.438	0.357	0.31	0.351	0.35	0.397	0.367	0.422	0.468	0.037	0.11	0.191	0.305	0.362	0.313	0.264	0.185	0.139	0.058	0.041	0.142	0.213	0.262	0.332	0.336	0.233	0.17	0.202	0.032	3
0.491	0.475	0.402	0.464	0.509	0.521	0.541	0.451	0.386	0.378	0.395	0.41	0.475	0.552	0.54	0.522	0.487	0.469	0.378	0.406	0.038	0.151	0.227	0.311	0.388	0.426	0.36	0.235	0.123	0.057	0.027	0.101	0.238	0.414	0.4	0.479	0.32	0.198	0.106	0.034	3
0.42	0.486	0.444	0.437	0.474	0.435	0.463	0.449	0.405	0.437	0.515	0.54	0.487	0.439	0.47	0.438	0.414	0.434	0.366	0.353	0.043	0.125	0.229	0.323	0.539	0.376	0.267	0.188	0.112	0.036	0.063	0.169	0.257	0.332	0.377	0.369	0.285	0.208	0.138	0.034	3
0.416	0.398	0.409	0.381	0.387	0.43	0.388	0.409	0.391	0.423	0.468	0.444	0.41	0.44	0.396	0.404	0.374	0.36	0.374	0.363	0.049	0.109	0.254	0.381	0.291	0.318	0.249	0.171	0.138	0.058	0.043	0.124	0.206	0.3	0.361	0.402	0.279	0.187	0.086	0.032	3
0.388	0.407	0.482	0.55	0.564	0.538	0.522	0.475	0.395	0.416	0.389	0.43	0.531	0.519	0.517	0.477	0.404	0.457	0.507	0.498	0.032	0.11	0.216	0.34	0.472	0.387	0.455	0.223	0.105	0.032	0.037	0.154	0.239	0.31	0.408	0.437	0.353	0.235	0.157	0.043	3
0.482	0.474	0.548	0.607	0.602	0.58	0.504	0.465	0.474	0.45	0.513	0.481	0.517	0.553	0.561	0.522	0.486	0.503	0.512	0.548	0.038	0.101	0.276	0.433	0.447	0.461	0.38	0.262	0.16	0.054	0.041	0.169	0.282	0.372	0.468	0.441	0.373	0.273	0.146	0.044	3
0.485	0.499	0.471	0.502	0.562	0.534	0.548	0.52	0.497	0.475	0.474	0.514	0.553	0.515	0.52	0.483	0.479	0.492	0.55	0.517	0.059	0.158	0.252	0.323	0.417	0.541	0.381	0.244	0.135	0.05	0.046	0.165	0.251	0.331	0.46	0.467	0.368	0.275	0.151	0.041	3
0.31	0.375	0.374	0.428	0.377	0.402	0.45	0.527	0.543	0.566	0.477	0.495	0.478	0.439	0.438	0.431	0.388	0.424	0.379	0.397	0.041	0.185	0.247	0.36	0.497	0.307	0.251	0.172	0.096	0.031	0.043	0.118	0.217	0.3	0.353	0.365	0.315	0.255	0.163	0.05	3
0.407	0.428	0.408	0.39	0.445	0.413	0.403	0.405	0.445	0.486	0.486	0.479	0.47	0.426	0.444	0.386	0.402	0.414	0.373	0.356	0.052	0.148	0.194	0.343	0.498	0.293	0.254	0.18	0.112	0.05	0.063	0.138	0.209	0.305	0.364	0.393	0.3	0.194	0.119	0.038	3
0.323	0.291	0.3	0.28	0.291	0.368	0.33	0.359	0.296	0.216	0.275	0.298	0.26	0.304	0.274	0.252	0.308	0.352	0.343	0.371	0.033	0.106	0.148	0.219	0.236	0.223	0.198	0.151	0.134	0.074	0.021	0.062	0.11	0.157	0.3	0.499	0.165	0.109	0.072	0.025	3
0.402	0.294	0.29	0.332	0.353	0.274	0.253	0.221	0.205	0.262	0.285	0.246	0.309	0.351	0.298	0.31	0.309	0.272	0.264	0.257	0.019	0.06	0.152	0.202	0.245	0.245	0.231	0.162	0.092	0.041	0.02	0.058	0.223	0.311	0.226	0.228	0.156	0.12	0.088	0.025	3
0.228	0.325	0.403	0.392	0.474	0.537	0.554	0.388	0.304	0.292	0.229	0.267	0.325	0.373	0.344	0.407	0.51	0.473	0.521	0.439	0.038	0.105	0.167	0.245	0.307	0.335	0.295	0.249	0.169	0.03	0.026	0.053	0.091	0.135	0.396	0.596	0.359	0.192	0.079	0.019	3
0.343	0.382	0.406	0.462	0.557	0.528	0.36	0.293	0.299	0.359	0.235	0.315	0.334	0.364	0.392	0.417	0.495	0.48	0.505	0.44	0.049	0.115	0.173	0.227	0.286	0.315	0.304	0.248	0.195	0.076	0.021	0.05	0.095	0.2	0.521	0.569	0.298	0.149	0.07	0.023	3
0.245	0.261	0.286	0.302	0.242	0.256	0.399	0.332	0.259	0.254	0.406	0.386	0.336	0.276	0.266	0.223	0.246	0.224	0.227	0.243	0.061	0.147	0.189	0.187	0.216	0.193	0.171	0.128	0.089	0.04	0.024	0.067	0.096	0.201	0.499	0.265	0.111	0.083	0.048	0.028	3
0.283	0.311	0.291	0.333	0.448	0.63	0.565	0.517	0.444	0.503	0.521	0.437	0.426	0.484	0.463	0.479	0.415	0.398	0.346	0.342	0.084	0.2	0.291	0.324	0.362	0.32	0.249	0.185	0.113	0.03	0.042	0.089	0.131	0.246	0.398	0.523	0.481	0.182	0.054	0.016	3
0.365	0.36	0.313	0.259	0.309	0.326	0.309	0.248	0.198	0.192	0.414	0.367	0.342	0.33	0.26	0.267	0.245	0.217	0.219	0.213	0.023	0.086	0.186	0.221	0.242	0.229	0.172	0.157	0.097	0.027	0.034	0.076	0.224	0.377	0.23	0.194	0.135	0.099	0.055	0.02	3
0.294	0.21	0.216	0.227	0.289	0.349	0.352	0.299	0.271	0.339	0.25	0.244	0.297	0.29	0.275	0.327	0.346	0.273	0.259	0.286	0.031	0.077	0.161	0.223	0.241	0.251	0.2	0.159	0.057	0.024	0.032	0.089	0.121	0.155	0.228	0.205	0.29	0.234	0.056	0.015	3
0.253	0.208	0.277	0.339	0.443	0.47	0.346	0.372	0.357	0.246	0.361	0.397	0.378	0.313	0.294	0.295	0.314	0.348	0.302	0.302	0.02	0.067	0.096	0.297	0.495	0.37	0.146	0.094	0.051	0.021	0.023	0.14	0.194	0.241	0.246	0.25	0.192	0.168	0.139	0.061	3
0.269	0.345	0.345	0.345	0.345	0.283	0.323	0.377	0.336	0.227	0.411	0.355	0.322	0.292	0.326	0.31	0.304	0.261	0.308	0.305	0.03	0.092	0.105	0.184	0.435	0.411	0.142	0.097	0.071	0.031	0.044	0.16	0.179	0.202	0.267	0.244	0.199	0.157	0.108	0.041	3
0.341	0.336	0.348	0.299	0.303	0.367	0.362	0.257	0.194	0.21	0.334	0.332	0.323	0.275	0.3	0.314	0.289	0.256	0.297	0.292	0.021	0.072	0.115	0.154	0.226	0.456	0.299	0.09	0.057	0.022	0.082	0.125	0.156	0.21	0.239	0.239	0.196	0.144	0.098	0.02	3
0.185	0.196	0.184	0.152	0.132	0.151	0.183	0.175	0.232	0.192	0.117	0.127	0.157	0.209	0.174	0.209	0.238	0.213	0.182	0.154	0.04	0.089	0.098	0.099	0.108	0.111	0.097	0.096	0.087	0.064	0.006	0.016	0.027	0.038	0.234	0.431	0.103	0.027	0.013	0.005	3
0.185	0.183	0.131	0.141	0.16	0.191	0.164	0.269	0.131	0.068	0.119	0.124	0.148	0.224	0.18	0.199	0.252	0.193	0.129	0.057	0.012	0.067	0.111	0.109	0.106	0.106	0.101	0.089	0.085	0.025	0.006	0.015	0.029	0.053	0.382	0.234	0.051	0.027	0.014	0.004	3
0.218	0.191	0.201	0.176	0.167	0.202	0.144	0.063	0.045	0.042	0.08	0.111	0.156	0.179	0.175	0.16	0.12	0.156	0.162	0.147	0.006	0.015	0.027	0.029	0.046	0.218	0.337	0.027	0.013	0.006	0.033	0.075	0.095	0.105	0.107	0.086	0.098	0.083	0.035	0.004	3
0.051	0.047	0.036	0.04	0.044	0.084	0.177	0.169	0.148	0.125	0.175	0.145	0.162	0.129	0.095	0.051	0.039	0.043	0.04	0.038	0.005	0.042	0.227	0.036	0.037	0.036	0.028	0.02	0.013	0.005	0.006	0.015	0.032	0.094	0.101	0.091	0.071	0.036	0.012	0.004	3
0.087	0.172	0.18	0.172	0.159	0.204	0.192	0.203	0.179	0.101	0.183	0.173	0.159	0.172	0.162	0.137	0.128	0.183	0.183	0.16	0.005	0.015	0.025	0.038	0.425	0.233	0.034	0.028	0.017	0.005	0.042	0.084	0.084	0.088	0.107	0.109	0.081	0.099	0.078	0.048	3
0.057	0.045	0.042	0.07	0.15	0.232	0.213	0.196	0.195	0.179	0.201	0.166	0.15	0.136	0.172	0.171	0.166	0.122	0.05	0.04	0.005	0.014	0.101	0.361	0.097	0.041	0.031	0.02	0.011	0.005	0.007	0.021	0.086	0.109	0.101	0.099	0.099	0.092	0.061	0.007	3
0.205	0.163	0.184	0.202	0.156	0.141	0.066	0.043	0.042	0.038	0.063	0.056	0.105	0.146	0.121	0.148	0.164	0.145	0.162	0.132	0.006	0.014	0.022	0.031	0.038	0.057	0.344	0.089	0.014	0.005	0.009	0.061	0.084	0.081	0.109	0.099	0.087	0.063	0.02	0.003	3
0.153	0.174	0.174	0.162	0.168	0.153	0.137	0.161	0.172	0.176	0.118	0.119	0.162	0.283	0.241	0.199	0.155	0.143	0.15	0.066	0.006	0.018	0.025	0.052	0.38	0.248	0.045	0.022	0.015	0.006	0.044	0.055	0.097	0.123	0.117	0.108	0.087	0.073	0.079	0.034	3
0.065	0.05	0.045	0.069	0.179	0.202	0.226	0.207	0.192	0.181	0.166	0.247	0.16	0.179	0.197	0.191	0.134	0.053	0.048	0.046	0.013	0.033	0.123	0.35	0.054	0.054	0.034	0.024	0.013	0.006	0.008	0.02	0.079	0.114	0.118	0.147	0.103	0.079	0.035	0.004	3
0.064	0.13	0.275	0.37	0.396	0.396	0.313	0.263	0.112	0.046	0.061	0.112	0.207	0.38	0.451	0.465	0.391	0.179	0.054	0.053	0.005	0.014	0.033	0.186	0.371	0.311	0.202	0.027	0.017	0.006	0.007	0.016	0.119	0.191	0.259	0.267	0.231	0.056	0.014	0.006	4
0.063	0.05	0.136	0.2	0.321	0.395	0.291	0.164	0.087	0.089	0.134	0.246	0.348	0.239	0.234	0.242	0.178	0.049	0.049	0.062	0.012	0.04	0.13	0.174	0.248	0.192	0.03	0.031	0.019	0.008	0.006	0.027	0.078	0.219	0.211	0.191	0.117	0.027	0.013	0.005	4
0.133	0.207	0.406	0.423	0.371	0.37	0.346	0.271	0.217	0.124	0.083	0.129	0.332	0.322	0.324	0.319	0.373	0.383	0.267	0.329	0.009	0.025	0.069	0.217	0.32	0.279	0.219	0.158	0.092	0.04	0.009	0.024	0.081	0.214	0.327	0.353	0.216	0.104	0.086	0.02	4
0.085	0.064	0.066	0.138	0.183	0.236	0.317	0.25	0.145	0.077	0.077	0.071	0.089	0.098	0.109	0.162	0.232	0.212	0.209	0.295	0.01	0.032	0.048	0.042	0.167	0.202	0.137	0.097	0.031	0.01	0.009	0.019	0.031	0.049	0.082	0.133	0.2	0.189	0.055	0.006	4
0.202	0.24	0.359	0.349	0.352	0.4	0.393	0.454	0.313	0.162	0.186	0.18	0.345	0.406	0.439	0.351	0.33	0.375	0.385	0.229	0.011	0.099	0.161	0.213	0.276	0.289	0.283	0.186	0.079	0.008	0.011	0.039	0.116	0.21	0.377	0.345	0.252	0.172	0.068	0.019	4
0.064	0.091	0.169	0.241	0.248	0.323	0.387	0.345	0.329	0.214	0.336	0.276	0.323	0.304	0.352	0.312	0.284	0.133	0.041	0.036	0.054	0.096	0.089	0.37	0.342	0.183	0.03	0.024	0.017	0.006	0.009	0.036	0.146	0.203	0.236	0.211	0.201	0.132	0.022	0.004	4
0.095	0.151	0.26	0.283	0.2	0.186	0.152	0.082	0.058	0.04	0.202	0.184	0.316	0.211	0.047	0.043	0.047	0.108	0.155	0.18	0.006	0.021	0.093	0.2	0.111	0.082	0.04	0.087	0.092	0.02	0.015	0.025	0.146	0.147	0.142	0.178	0.06	0.017	0.012	0.004	4
0.19	0.138	0.264	0.35	0.41	0.364	0.283	0.228	0.114	0.106	0.204	0.244	0.254	0.255	0.311	0.278	0.356	0.312	0.166	0.06	0.023	0.043	0.068	0.189	0.253	0.308	0.212	0.084	0.034	0.009	0.035	0.04	0.133	0.208	0.248	0.232	0.2	0.096	0.023	0.003	4
0.131	0.123	0.205	0.292	0.271	0.229	0.241	0.204	0.18	0.095	0.125	0.197	0.111	0.067	0.053	0.066	0.311	0.281	0.371	0.362	0.006	0.023	0.062	0.08	0.14	0.246	0.196	0.138	0.072	0.017	0.01	0.043	0.081	0.088	0.123	0.176	0.188	0.137	0.097	0.036	4
0.11	0.088	0.2	0.386	0.294	0.299	0.34	0.147	0.106	0.095	0.08	0.181	0.246	0.295	0.293	0.261	0.21	0.226	0.182	0.091	0.009	0.019	0.047	0.21	0.232	0.219	0.209	0.055	0.026	0.008	0.013	0.029	0.089	0.194	0.211	0.2	0.186	0.061	0.031	0.013	4
0.149	0.186	0.315	0.261	0.193	0.235	0.262	0.238	0.11	0.101	0.347	0.301	0.255	0.27	0.285	0.173	0.103	0.085	0.101	0.117	0.013	0.071	0.12	0.177	0.259	0.221	0.062	0.046	0.036	0.016	0.039	0.094	0.135	0.177	0.26	0.165	0.059	0.048	0.032	0.011	4
0.11	0.156	0.23	0.282	0.288	0.238	0.187	0.077	0.045	0.043	0.342	0.319	0.241	0.217	0.099	0.092	0.094	0.078	0.085	0.072	0.006	0.037	0.118	0.17	0.202	0.122	0.079	0.05	0.031	0.009	0.014	0.089	0.159	0.249	0.154	0.074	0.04	0.025	0.015	0.006	4
0.184	0.174	0.223	0.312	0.426	0.431	0.394	0.301	0.297	0.181	0.153	0.199	0.405	0.502	0.366	0.269	0.296	0.28	0.227	0.216	0.014	0.061	0.174	0.251	0.309	0.282	0.171	0.127	0.05	0.016	0.022	0.062	0.089	0.213	0.249	0.363	0.297	0.097	0.052	0.014	4
0.111	0.207	0.411	0.423	0.396	0.428	0.431	0.414	0.377	0.094	0.087	0.232	0.433	0.446	0.414	0.431	0.497	0.476	0.159	0.122	0.007	0.022	0.218	0.308	0.283	0.339	0.239	0.167	0.048	0.009	0.009	0.021	0.067	0.341	0.384	0.328	0.281	0.17	0.031	0.008	4
0.099	0.087	0.087	0.091	0.098	0.176	0.342	0.35	0.288	0.289	0.276	0.269	0.342	0.397	0.197	0.123	0.1	0.07	0.066	0.068	0.041	0.165	0.227	0.192	0.133	0.076	0.049	0.036	0.022	0.008	0.01	0.024	0.06	0.146	0.265	0.218	0.144	0.057	0.024	0.006	4
0.087	0.16	0.239	0.219	0.258	0.273	0.246	0.242	0.124	0.067	0.126	0.077	0.073	0.069	0.066	0.067	0.137	0.401	0.437	0.441	0.012	0.028	0.043	0.049	0.067	0.244	0.227	0.147	0.113	0.02	0.011	0.026	0.041	0.057	0.072	0.262	0.218	0.153	0.101	0.009	4
0.441	0.412	0.413	0.259	0.067	0.072	0.076	0.096	0.085	0.091	0.093	0.191	0.267	0.264	0.248	0.236	0.261	0.255	0.124	0.093	0.012	0.03	0.039	0.053	0.105	0.27	0.237	0.148	0.1	0.016	0.022	0.12	0.161	0.241	0.233	0.107	0.055	0.038	0.027	0.008	4
0.274	0.267	0.269	0.271	0.144	0.066	0.072	0.075	0.085	0.08	0.274	0.266	0.3	0.268	0.105	0.103	0.082	0.074	0.067	0.067	0.01	0.025	0.045	0.139	0.192	0.204	0.112	0.051	0.023	0.008	0.039	0.158	0.221	0.131	0.071	0.066	0.05	0.038	0.02	0.007	4
0.096	0.068	0.066	0.069	0.087	0.224	0.269	0.243	0.28	0.284	0.097	0.076	0.072	0.072	0.075	0.08	0.272	0.322	0.321	0.291	0.011	0.022	0.039	0.129	0.206	0.19	0.155	0.058	0.021	0.01	0.01	0.026	0.038	0.056	0.061	0.062	0.097	0.3	0.145	0.043	4
0.084	0.063	0.091	0.088	0.111	0.199	0.326	0.281	0.251	0.197	0.291	0.258	0.214	0.241	0.185	0.117	0.154	0.084	0.079	0.061	0.034	0.136	0.192	0.164	0.088	0.099	0.055	0.032	0.023	0.015	0.013	0.039	0.031	0.095	0.223	0.243	0.157	0.03	0.013	0.003	4
0.083	0.087	0.101	0.147	0.216	0.341	0.31	0.333	0.279	0.305	0.156	0.137	0.136	0.211	0.293	0.299	0.282	0.234	0.199	0.254	0.014	0.079	0.147	0.173	0.211	0.188	0.159	0.093	0.022	0.009	0.012	0.021	0.048	0.098	0.114	0.237	0.289	0.177	0.077	0.023	4
0.249	0.311	0.217	0.153	0.188	0.225	0.191	0.213	0.247	0.223	0.346	0.3	0.443	0.193	0.149	0.164	0.16	0.169	0.152	0.129	0.037	0.101	0.168	0.161	0.178	0.17	0.128	0.093	0.056	0.015	0.032	0.079	0.164	0.215	0.222	0.169	0.083	0.072	0.04	0.028	4
0.053	0.036	0.043	0.049	0.179	0.376	0.311	0.278	0.396	0.047	0.141	0.274	0.193	0.198	0.181	0.186	0.198	0.204	0.156	0.035	0.005	0.067	0.193	0.17	0.166	0.181	0.058	0.019	0.012	0.005	0.006	0.013	0.025	0.14	0.187	0.166	0.159	0.147	0.031	0.003	4
0.247	0.362	0.393	0.348	0.348	0.215	0.128	0.094	0.11	0.091	0.125	0.131	0.122	0.275	0.284	0.31	0.381	0.381	0.203	0.135	0.011	0.031	0.067	0.081	0.138	0.249	0.266	0.195	0.118	0.015	0.015	0.038	0.1	0.265	0.273	0.283	0.117	0.045	0.029	0.008	4
0.086	0.062	0.089	0.106	0.086	0.152	0.418	0.486	0.443	0.344	0.235	0.24	0.245	0.198	0.164	0.223	0.293	0.26	0.216	0.218	0.061	0.12	0.146	0.191	0.258	0.184	0.119	0.043	0.017	0.006	0.008	0.019	0.05	0.079	0.226	0.231	0.165	0.187	0.147	0.031	4
0.453	0.505	0.459	0.469	0.481	0.429	0.417	0.458	0.467	0.59	0.517	0.622	0.582	0.531	0.466	0.413	0.415	0.391	0.521	0.281	0.048	0.129	0.282	0.367	0.508	0.443	0.292	0.19	0.095	0.016	0.052	0.214	0.304	0.356	0.329	0.375	0.326	0.187	0.154	0.076	4
0.216	0.432	0.428	0.44	0.393	0.41	0.366	0.281	0.246	0.147	0.113	0.311	0.365	0.373	0.347	0.362	0.408	0.471	0.266	0.333	0.012	0.028	0.114	0.244	0.358	0.303	0.271	0.19	0.113	0.042	0.009	0.037	0.197	0.276	0.355	0.355	0.216	0.098	0.109	0.021	4
0.092	0.07	0.063	0.074	0.075	0.15	0.236	0.243	0.243	0.255	0.078	0.068	0.072	0.069	0.07	0.124	0.272	0.237	0.268	0.245	0.006	0.02	0.039	0.123	0.184	0.182	0.128	0.04	0.022	0.01	0.009	0.022	0.036	0.051	0.068	0.061	0.115	0.202	0.143	0.042	4
0.178	0.189	0.148	0.191	0.216	0.333	0.423	0.422	0.347	0.293	0.26	0.254	0.321	0.282	0.209	0.357	0.348	0.26	0.225	0.221	0.046	0.145	0.205	0.221	0.186	0.182	0.152	0.13	0.067	0.032	0.011	0.026	0.046	0.147	0.354	0.33	0.249	0.143	0.059	0.01	4
0.444	0.39	0.332	0.347	0.263	0.249	0.237	0.144	0.13	0.112	0.312	0.291	0.314	0.325	0.387	0.194	0.255	0.247	0.185	0.129	0.013	0.036	0.068	0.187	0.317	0.277	0.181	0.146	0.082	0.021	0.04	0.147	0.246	0.275	0.178	0.224	0.101	0.062	0.032	0.022	4
0.293	0.186	0.328	0.384	0.369	0.31	0.224	0.164	0.068	0.083	0.236	0.251	0.153	0.218	0.334	0.334	0.244	0.197	0.187	0.253	0.012	0.028	0.049	0.109	0.262	0.341	0.203	0.125	0.058	0.023	0.066	0.116	0.089	0.139	0.254	0.256	0.173	0.067	0.044	0.005	4
0.371	0.351	0.299	0.218	0.189	0.111	0.101	0.134	0.18	0.151	0.174	0.168	0.169	0.17	0.217	0.135	0.205	0.291	0.333	0.239	0.016	0.073	0.095	0.082	0.085	0.118	0.158	0.206	0.198	0.018	0.034	0.063	0.093	0.111	0.229	0.259	0.186	0.056	0.018	0.005	4
0.223	0.216	0.259	0.404	0.543	0.486	0.323	0.293	0.379	0.36	0.115	0.157	0.273	0.384	0.41	0.42	0.39	0.45	0.544	0.344	0.005	0.028	0.179	0.272	0.369	0.265	0.265	0.214	0.095	0.046	0.008	0.015	0.083	0.201	0.381	0.428	0.25	0.176	0.128	0.072	4
0.136	0.125	0.121	0.378	0.384	0.387	0.495	0.453	0.491	0.63	0.3	0.235	0.274	0.346	0.399	0.367	0.427	0.449	0.454	0.352	0.056	0.108	0.234	0.301	0.358	0.316	0.241	0.144	0.038	0.014	0.014	0.034	0.085	0.188	0.278	0.313	0.314	0.344	0.188	0.047	4
0.2	0.248	0.295	0.353	0.296	0.386	0.385	0.35	0.371	0.331	0.211	0.124	0.17	0.24	0.214	0.274	0.299	0.471	0.608	0.594	0.008	0.043	0.115	0.165	0.339	0.331	0.239	0.193	0.139	0.038	0.032	0.043	0.055	0.161	0.229	0.293	0.286	0.244	0.202	0.068	4
0.355	0.374	0.419	0.435	0.546	0.513	0.335	0.3	0.242	0.183	0.197	0.22	0.289	0.263	0.311	0.443	0.52	0.507	0.418	0.53	0.013	0.034	0.106	0.284	0.284	0.263	0.357	0.271	0.183	0.06	0.012	0.056	0.15	0.263	0.338	0.39	0.34	0.198	0.091	0.013	4
0.129	0.3	0.328	0.334	0.333	0.441	0.599	0.592	0.592	0.635	0.422	0.418	0.396	0.457	0.452	0.527	0.513	0.472	0.391	0.244	0.074	0.203	0.271	0.296	0.446	0.412	0.268	0.136	0.029	0.011	0.034	0.06	0.117	0.247	0.406	0.483	0.341	0.241	0.157	0.065	4
0.335	0.367	0.325	0.364	0.434	0.404	0.425	0.474	0.392	0.285	0.597	0.627	0.532	0.561	0.491	0.405	0.172	0.134	0.142	0.139	0.058	0.173	0.244	0.339	0.449	0.336	0.194	0.073	0.028	0.009	0.062	0.159	0.298	0.33	0.357	0.339	0.198	0.075	0.053	0.03	4
0.267	0.267	0.266	0.339	0.393	0.434	0.437	0.422	0.491	0.46	0.169	0.165	0.206	0.245	0.377	0.54	0.533	0.621	0.47	0.453	0.023	0.058	0.157	0.245	0.364	0.379	0.324	0.222	0.1	0.019	0.019	0.027	0.096	0.214	0.295	0.321	0.347	0.321	0.184	0.065	4
0.25	0.312	0.269	0.276	0.233	0.286	0.282	0.267	0.349	0.438	0.165	0.227	0.262	0.25	0.496	0.498	0.481	0.197	0.199	0.21	0.033	0.077	0.12	0.212	0.29	0.324	0.292	0.097	0.032	0.009	0.029	0.088	0.114	0.193	0.22	0.274	0.256	0.174	0.086	0.047	4
0.068	0.085	0.125	0.161	0.15	0.177	0.263	0.301	0.378	0.11	0.108	0.173	0.184	0.183	0.181	0.194	0.254	0.23	0.173	0.137	0.01	0.072	0.131	0.148	0.192	0.124	0.116	0.07	0.036	0.009	0.007	0.017	0.039	0.072	0.17	0.252	0.161	0.122	0.055	0.014	4
0.129	0.107	0.185	0.201	0.226	0.221	0.264	0.073	0.056	0.057	0.167	0.175	0.173	0.161	0.159	0.166	0.173	0.165	0.139	0.047	0.007	0.021	0.059	0.126	0.154	0.168	0.167	0.042	0.015	0.005	0.032	0.053	0.065	0.147	0.148	0.12	0.107	0.068	0.014	0.004	4
0.059	0.045	0.057	0.146	0.184	0.31	0.163	0.096	0.122	0.167	0.094	0.165	0.187	0.176	0.166	0.175	0.146	0.093	0.065	0.086	0.021	0.038	0.041	0.152	0.21	0.118	0.044	0.03	0.014	0.004	0.007	0.017	0.05	0.131	0.144	0.117	0.103	0.054	0.035	0.02	4
0.112	0.262	0.283	0.383	0.253	0.116	0.09	0.094	0.076	0.101	0.192	0.236	0.195	0.182	0.186	0.166	0.161	0.167	0.151	0.142	0.008	0.032	0.037	0.121	0.193	0.181	0.154	0.123	0.029	0.009	0.025	0.092	0.137	0.149	0.152	0.134	0.121	0.038	0.028	0.014	4
0.055	0.044	0.047	0.146	0.122	0.136	0.13	0.181	0.056	0.051	0.174	0.164	0.177	0.147	0.089	0.037	0.036	0.044	0.054	0.044	0.009	0.042	0.078	0.136	0.111	0.041	0.027	0.02	0.014	0.005	0.006	0.032	0.076	0.091	0.107	0.091	0.038	0.026	0.011	0.005	4
0.078	0.101	0.106	0.096	0.135	0.236	0.227	0.299	0.123	0.101	0.086	0.071	0.082	0.096	0.138	0.197	0.198	0.174	0.194	0.258	0.007	0.025	0.04	0.095	0.174	0.163	0.127	0.068	0.033	0.019	0.011	0.022	0.038	0.053	0.078	0.135	0.193	0.136	0.066	0.013	4
0.153	0.149	0.196	0.136	0.057	0.054	0.055	0.062	0.174	0.258	0.192	0.14	0.117	0.13	0.149	0.103	0.079	0.136	0.131	0.12	0.039	0.024	0.033	0.084	0.164	0.14	0.115	0.032	0.014	0.006	0.019	0.069	0.099	0.113	0.072	0.061	0.037	0.033	0.103	0.045	4
0.164	0.141	0.162	0.18	0.248	0.176	0.182	0.202	0.171	0.223	0.208	0.221	0.229	0.205	0.215	0.181	0.157	0.153	0.136	0.148	0.013	0.037	0.094	0.175	0.243	0.165	0.139	0.042	0.013	0.005	0.015	0.102	0.123	0.136	0.117	0.068	0.151	0.118	0.07	0.022	4
0.292	0.372	0.154	0.098	0.157	0.154	0.145	0.166	0.189	0.126	0.116	0.185	0.28	0.29	0.153	0.162	0.178	0.168	0.157	0.181	0.008	0.071	0.116	0.084	0.102	0.15	0.171	0.122	0.09	0.016	0.012	0.085	0.121	0.13	0.194	0.165	0.109	0.085	0.027	0.006	4
0.071	0.06	0.144	0.241	0.193	0.066	0.062	0.109	0.186	0.106	0.17	0.148	0.117	0.071	0.087	0.115	0.083	0.078	0.163	0.192	0.016	0.027	0.056	0.118	0.129	0.08	0.044	0.097	0.039	0.006	0.009	0.045	0.097	0.049	0.056	0.098	0.147	0.064	0.035	0.016	4
0.072	0.098	0.415	0.249	0.218	0.294	0.121	0.061	0.058	0.051	0.08	0.092	0.242	0.198	0.189	0.187	0.184	0.169	0.182	0.105	0.008	0.018	0.03	0.097	0.159	0.191	0.142	0.138	0.018	0.006	0.008	0.021	0.115	0.14	0.176	0.165	0.122	0.04	0.016	0.005	4
0.068	0.056	0.045	0.05	0.249	0.331	0.321	0.075	0.061	0.059	0.089	0.077	0.091	0.105	0.138	0.144	0.171	0.158	0.158	0.176	0.007	0.024	0.042	0.074	0.135	0.16	0.121	0.063	0.017	0.007	0.009	0.015	0.031	0.062	0.108	0.141	0.144	0.102	0.034	0.006	4
0.066	0.057	0.086	0.386	0.262	0.285	0.091	0.082	0.068	0.061	0.187	0.176	0.183	0.184	0.164	0.169	0.175	0.093	0.058	0.055	0.006	0.022	0.084	0.144	0.151	0.151	0.113	0.026	0.017	0.006	0.009	0.025	0.103	0.171	0.171	0.131	0.058	0.028	0.017	0.006	4
0.062	0.047	0.051	0.052	0.058	0.109	0.469	0.309	0.401	0.073	0.155	0.167	0.157	0.155	0.172	0.17	0.178	0.169	0.159	0.161	0.008	0.099	0.133	0.144	0.148	0.135	0.102	0.029	0.015	0.005	0.008	0.016	0.024	0.067	0.146	0.163	0.159	0.154	0.074	0.007	4
0.101	0.455	0.301	0.445	0.075	0.08	0.066	0.057	0.051	0.055	0.156	0.17	0.161	0.16	0.175	0.178	0.182	0.182	0.161	0.17	0.006	0.016	0.028	0.078	0.164	0.159	0.148	0.123	0.097	0.027	0.007	0.084	0.138	0.154	0.181	0.156	0.068	0.035	0.015	0.005	4
0.069	0.054	0.058	0.059	0.354	0.412	0.12	0.077	0.066	0.076	0.103	0.104	0.136	0.147	0.151	0.16	0.156	0.15	0.153	0.075	0.01	0.022	0.047	0.118	0.146	0.136	0.121	0.044	0.017	0.006	0.007	0.018	0.038	0.1	0.141	0.151	0.135	0.044	0.021	0.008	4
0.057	0.048	0.04	0.313	0.322	0.31	0.303	0.315	0.034	0.037	0.07	0.164	0.269	0.189	0.192	0.179	0.19	0.199	0.204	0.117	0.005	0.012	0.074	0.199	0.177	0.165	0.175	0.058	0.012	0.006	0.007	0.012	0.044	0.17	0.182	0.168	0.156	0.126	0.012	0.003	4
0.054	0.033	0.035	0.043	0.05	0.123	0.398	0.31	0.289	0.407	0.058	0.082	0.269	0.208	0.197	0.179	0.178	0.19	0.196	0.194	0.006	0.058	0.193	0.168	0.161	0.18	0.069	0.018	0.012	0.005	0.006	0.013	0.02	0.029	0.133	0.179	0.163	0.146	0.142	0.041	4
0.054	0.04	0.033	0.039	0.051	0.042	0.29	0.248	0.243	0.272	0.222	0.153	0.141	0.137	0.146	0.153	0.204	0.057	0.041	0.061	0.059	0.089	0.108	0.169	0.123	0.041	0.027	0.02	0.014	0.005	0.007	0.012	0.021	0.069	0.149	0.14	0.114	0.103	0.034	0.009	4
0.056	0.039	0.05	0.045	0.213	0.17	0.182	0.213	0.11	0.038	0.066	0.038	0.037	0.03	0.039	0.061	0.206	0.25	0.192	0.183	0.007	0.012	0.018	0.029	0.088	0.208	0.109	0.058	0.018	0.005	0.007	0.015	0.021	0.027	0.033	0.086	0.171	0.117	0.069	0.006	4
0.053	0.036	0.038	0.051	0.124	0.242	0.223	0.23	0.3	0.067	0.192	0.18	0.191	0.205	0.184	0.036	0.049	0.064	0.104	0.136	0.023	0.084	0.132	0.166	0.075	0.089	0.052	0.032	0.015	0.004	0.006	0.012	0.047	0.096	0.145	0.165	0.089	0.055	0.046	0.012	4
0.087	0.164	0.318	0.289	0.432	0.25	0.23	0.229	0.206	0.257	0.226	0.22	0.217	0.245	0.226	0.172	0.236	0.306	0.314	0.296	0.008	0.062	0.13	0.223	0.232	0.166	0.141	0.155	0.098	0.01	0.008	0.026	0.088	0.201	0.25	0.29	0.153	0.052	0.103	0.059	4
0.075	0.057	0.07	0.124	0.187	0.209	0.294	0.255	0.073	0.041	0.059	0.039	0.074	0.257	0.284	0.223	0.206	0.127	0.057	0.057	0.005	0.014	0.025	0.147	0.252	0.109	0.076	0.027	0.019	0.01	0.007	0.015	0.022	0.092	0.137	0.18	0.172	0.045	0.013	0.005	4
0.287	0.189	0.194	0.174	0.088	0.056	0.072	0.201	0.22	0.286	0.122	0.097	0.149	0.143	0.174	0.209	0.25	0.279	0.222	0.144	0.036	0.062	0.063	0.105	0.153	0.059	0.131	0.172	0.083	0.024	0.011	0.049	0.056	0.082	0.166	0.218	0.166	0.071	0.052	0.022	4
0.295	0.32	0.276	0.208	0.116	0.139	0.192	0.366	0.32	0.221	0.267	0.311	0.326	0.237	0.119	0.11	0.188	0.188	0.272	0.436	0.009	0.089	0.116	0.148	0.26	0.24	0.15	0.093	0.083	0.044	0.039	0.135	0.158	0.079	0.164	0.201	0.106	0.213	0.088	0.042	4
0.087	0.084	0.173	0.263	0.198	0.264	0.208	0.066	0.073	0.067	0.247	0.235	0.266	0.301	0.095	0.062	0.059	0.041	0.076	0.086	0.008	0.02	0.105	0.194	0.194	0.098	0.053	0.035	0.021	0.007	0.011	0.055	0.155	0.173	0.157	0.07	0.046	0.037	0.021	0.007	4
0.058	0.038	0.044	0.041	0.18	0.536	0.397	0.246	0.334	0.289	0.263	0.214	0.216	0.231	0.233	0.217	0.209	0.206	0.171	0.185	0.027	0.102	0.194	0.219	0.201	0.152	0.103	0.053	0.013	0.005	0.007	0.014	0.036	0.147	0.202	0.184	0.228	0.151	0.078	0.025	4
0.056	0.035	0.034	0.185	0.305	0.22	0.213	0.231	0.252	0.231	0.061	0.06	0.062	0.078	0.27	0.266	0.217	0.268	0.229	0.252	0.011	0.035	0.092	0.12	0.145	0.193	0.154	0.108	0.016	0.005	0.006	0.013	0.019	0.029	0.052	0.22	0.295	0.16	0.059	0.029	4
0.185	0.268	0.327	0.248	0.317	0.102	0.142	0.089	0.055	0.056	0.089	0.076	0.17	0.211	0.215	0.213	0.239	0.206	0.157	0.221	0.007	0.019	0.038	0.048	0.154	0.184	0.203	0.127	0.07	0.042	0.008	0.035	0.089	0.191	0.214	0.201	0.074	0.033	0.044	0.007	4
0.231	0.315	0.207	0.236	0.203	0.157	0.121	0.066	0.052	0.054	0.181	0.192	0.16	0.152	0.167	0.195	0.256	0.123	0.111	0.104	0.006	0.015	0.043	0.085	0.163	0.182	0.154	0.113	0.044	0.015	0.023	0.107	0.114	0.158	0.159	0.109	0.088	0.044	0.017	0.005	4
0.062	0.046	0.051	0.209	0.269	0.175	0.241	0.188	0.08	0.073	0.197	0.184	0.196	0.232	0.18	0.159	0.08	0.059	0.056	0.047	0.008	0.055	0.094	0.16	0.188	0.108	0.039	0.024	0.013	0.005	0.008	0.024	0.084	0.141	0.17	0.15	0.061	0.035	0.014	0.005	4
0.21	0.177	0.229	0.318	0.438	0.439	0.4	0.308	0.284	0.182	0.171	0.283	0.492	0.419	0.326	0.3	0.29	0.256	0.207	0.23	0.01	0.075	0.2	0.245	0.33	0.248	0.164	0.131	0.045	0.033	0.025	0.057	0.108	0.226	0.282	0.389	0.242	0.099	0.047	0.013	4
0.228	0.396	0.457	0.528	0.427	0.425	0.453	0.39	0.249	0.163	0.316	0.338	0.375	0.396	0.517	0.551	0.508	0.311	0.247	0.163	0.016	0.045	0.224	0.29	0.361	0.341	0.259	0.236	0.058	0.019	0.014	0.073	0.238	0.348	0.349	0.372	0.314	0.089	0.039	0.018	4
0.196	0.173	0.17	0.172	0.145	0.158	0.132	0.129	0.112	0.105	0.415	0.252	0.42	0.06	0.05	0.053	0.067	0.055	0.05	0.052	0.016	0.059	0.136	0.139	0.177	0.113	0.049	0.027	0.022	0.006	0.063	0.115	0.142	0.131	0.099	0.102	0.048	0.026	0.015	0.005	4
0.146	0.2	0.288	0.254	0.234	0.254	0.253	0.206	0.158	0.135	0.111	0.131	0.118	0.161	0.187	0.155	0.199	0.34	0.337	0.376	0.012	0.043	0.06	0.098	0.134	0.201	0.237	0.142	0.12	0.015	0.014	0.049	0.056	0.092	0.132	0.285	0.205	0.134	0.082	0.012	4
0.215	0.148	0.226	0.272	0.337	0.325	0.276	0.185	0.172	0.144	0.355	0.29	0.293	0.264	0.201	0.232	0.174	0.155	0.155	0.164	0.025	0.092	0.167	0.18	0.195	0.186	0.113	0.097	0.065	0.023	0.017	0.042	0.138	0.291	0.25	0.183	0.112	0.076	0.029	0.009	4
0.078	0.083	0.111	0.199	0.289	0.179	0.151	0.153	0.143	0.171	0.114	0.163	0.183	0.144	0.158	0.2	0.19	0.11	0.131	0.161	0.013	0.037	0.064	0.145	0.158	0.167	0.118	0.049	0.02	0.006	0.008	0.035	0.077	0.101	0.14	0.131	0.116	0.084	0.06	0.02	4
0.067	0.064	0.104	0.13	0.146	0.122	0.233	0.284	0.314	0.3	0.097	0.087	0.11	0.197	0.193	0.193	0.185	0.198	0.27	0.231	0.012	0.043	0.119	0.163	0.168	0.182	0.077	0.072	0.036	0.009	0.007	0.019	0.04	0.056	0.089	0.15	0.224	0.157	0.1	0.037	4
0.171	0.25	0.424	0.457	0.472	0.448	0.312	0.208	0.249	0.174	0.141	0.296	0.46	0.362	0.389	0.325	0.372	0.373	0.231	0.193	0.016	0.088	0.175	0.202	0.267	0.273	0.263	0.173	0.087	0.026	0.009	0.026	0.094	0.303	0.502	0.344	0.16	0.075	0.048	0.014	4
0.484	0.447	0.339	0.215	0.233	0.193	0.176	0.192	0.186	0.156	0.136	0.296	0.428	0.346	0.343	0.242	0.207	0.25	0.21	0.177	0.012	0.045	0.088	0.171	0.239	0.249	0.214	0.162	0.114	0.02	0.015	0.11	0.275	0.28	0.206	0.141	0.125	0.088	0.054	0.018	4
0.173	0.249	0.268	0.311	0.341	0.303	0.189	0.209	0.116	0.149	0.196	0.126	0.114	0.119	0.122	0.109	0.23	0.477	0.388	0.423	0.021	0.031	0.073	0.077	0.154	0.218	0.187	0.218	0.137	0.035	0.018	0.041	0.074	0.107	0.162	0.264	0.265	0.146	0.056	0.02	4
0.242	0.315	0.384	0.37	0.347	0.283	0.166	0.112	0.133	0.151	0.4	0.33	0.37	0.378	0.235	0.191	0.158	0.154	0.136	0.135	0.02	0.053	0.121	0.232	0.294	0.211	0.136	0.101	0.065	0.019	0.015	0.111	0.303	0.284	0.206	0.13	0.09	0.055	0.036	0.015	4
0.166	0.218	0.154	0.232	0.28	0.293	0.272	0.213	0.132	0.156	0.305	0.293	0.242	0.201	0.217	0.163	0.153	0.185	0.167	0.171	0.023	0.086	0.147	0.165	0.189	0.126	0.133	0.098	0.063	0.019	0.016	0.037	0.124	0.231	0.224	0.188	0.112	0.081	0.028	0.013	4
0.075	0.087	0.147	0.216	0.273	0.28	0.254	0.279	0.256	0.229	0.083	0.056	0.078	0.095	0.156	0.266	0.449	0.383	0.349	0.183	0.007	0.016	0.061	0.125	0.222	0.251	0.25	0.085	0.02	0.007	0.008	0.02	0.03	0.067	0.149	0.201	0.215	0.19	0.128	0.035	4
0.318	0.178	0.243	0.292	0.19	0.105	0.081	0.062	0.051	0.057	0.071	0.066	0.09	0.248	0.334	0.285	0.17	0.139	0.072	0.122	0.007	0.019	0.033	0.053	0.114	0.203	0.141	0.114	0.069	0.04	0.009	0.03	0.082	0.217	0.269	0.101	0.051	0.02	0.012	0.004	4
0.251	0.267	0.216	0.241	0.255	0.214	0.309	0.217	0.278	0.129	0.478	0.47	0.419	0.549	0.16	0.066	0.076	0.045	0.058	0.045	0.027	0.137	0.204	0.217	0.248	0.229	0.078	0.025	0.02	0.006	0.062	0.133	0.206	0.224	0.253	0.209	0.055	0.029	0.014	0.004	4
0.084	0.08	0.085	0.14	0.15	0.271	0.484	0.562	0.421	0.428	0.288	0.281	0.199	0.237	0.246	0.314	0.314	0.304	0.271	0.251	0.074	0.128	0.171	0.238	0.258	0.263	0.13	0.06	0.025	0.008	0.007	0.023	0.036	0.12	0.256	0.292	0.242	0.191	0.135	0.056	4
0.303	0.322	0.256	0.227	0.076	0.047	0.042	0.053	0.048	0.055	0.199	0.092	0.049	0.042	0.062	0.092	0.2	0.196	0.196	0.302	0.005	0.012	0.025	0.047	0.1	0.072	0.065	0.214	0.121	0.053	0.055	0.066	0.038	0.09	0.131	0.18	0.104	0.031	0.018	0.006	4
0.122	0.2	0.404	0.31	0.274	0.306	0.346	0.227	0.07	0.063	0.23	0.308	0.259	0.343	0.358	0.348	0.293	0.071	0.069	0.049	0.006	0.014	0.108	0.285	0.257	0.237	0.173	0.051	0.022	0.006	0.01	0.092	0.199	0.207	0.247	0.215	0.125	0.037	0.017	0.007	4
0.083	0.078	0.126	0.294	0.344	0.28	0.272	0.144	0.094	0.059	0.086	0.058	0.073	0.13	0.218	0.308	0.292	0.171	0.222	0.213	0.006	0.02	0.035	0.074	0.201	0.21	0.153	0.135	0.042	0.005	0.009	0.022	0.042	0.079	0.162	0.208	0.216	0.113	0.024	0.006	4
0.133	0.102	0.178	0.185	0.176	0.115	0.086	0.096	0.093	0.1	0.338	0.259	0.104	0.09	0.091	0.092	0.079	0.082	0.064	0.058	0.013	0.036	0.078	0.161	0.149	0.078	0.051	0.037	0.022	0.007	0.034	0.088	0.137	0.083	0.079	0.078	0.067	0.037	0.019	0.005	4
0.08	0.069	0.076	0.075	0.067	0.098	0.156	0.268	0.462	0.494	0.156	0.266	0.218	0.165	0.146	0.159	0.159	0.196	0.197	0.194	0.031	0.13	0.198	0.132	0.167	0.131	0.064	0.038	0.025	0.008	0.008	0.022	0.037	0.07	0.151	0.162	0.151	0.15	0.122	0.051	4
0.079	0.051	0.053	0.052	0.056	0.358	0.338	0.447	0.5	0.502	0.096	0.203	0.261	0.314	0.298	0.312	0.306	0.299	0.217	0.145	0.009	0.105	0.214	0.292	0.292	0.212	0.037	0.029	0.018	0.009	0.008	0.016	0.028	0.071	0.2	0.235	0.254	0.216	0.139	0.048	4
0.119	0.14	0.184	0.229	0.225	0.233	0.22	0.214	0.165	0.067	0.582	0.481	0.323	0.079	0.054	0.059	0.05	0.048	0.051	0.048	0.034	0.114	0.182	0.206	0.215	0.054	0.039	0.026	0.019	0.007	0.041	0.105	0.166	0.219	0.219	0.075	0.035	0.023	0.011	0.004	4
0.489	0.454	0.382	0.331	0.221	0.087	0.051	0.048	0.052	0.055	0.096	0.237	0.302	0.338	0.363	0.316	0.265	0.17	0.051	0.054	0.007	0.017	0.027	0.048	0.181	0.324	0.265	0.157	0.059	0.007	0.041	0.138	0.207	0.285	0.263	0.079	0.035	0.026	0.014	0.005	4
0.383	0.359	0.265	0.277	0.209	0.138	0.063	0.048	0.048	0.048	0.067	0.05	0.047	0.055	0.065	0.164	0.318	0.328	0.38	0.367	0.006	0.014	0.027	0.033	0.045	0.057	0.157	0.317	0.194	0.062	0.008	0.019	0.045	0.149	0.226	0.219	0.171	0.066	0.014	0.004	4
0.067	0.049	0.049	0.047	0.046	0.167	0.194	0.247	0.24	0.203	0.064	0.045	0.047	0.049	0.049	0.057	0.18	0.245	0.275	0.291	0.007	0.017	0.022	0.042	0.204	0.194	0.112	0.036	0.016	0.007	0.006	0.017	0.025	0.034	0.044	0.044	0.104	0.167	0.153	0.059	4
0.507	0.484	0.479	0.375	0.367	0.239	0.11	0.053	0.046	0.053	0.073	0.101	0.214	0.351	0.376	0.433	0.414	0.381	0.309	0.086	0.006	0.016	0.025	0.048	0.14	0.378	0.33	0.255	0.143	0.021	0.02	0.081	0.191	0.276	0.322	0.301	0.127	0.023	0.014	0.005	4
0.105	0.069	0.113	0.235	0.407	0.312	0.334	0.266	0.079	0.07	0.094	0.124	0.316	0.195	0.21	0.225	0.268	0.27	0.216	0.075	0.01	0.022	0.069	0.126	0.317	0.206	0.152	0.052	0.025	0.012	0.01	0.024	0.062	0.147	0.24	0.183	0.171	0.117	0.027	0.008	4
0.061	0.059	0.042	0.042	0.046	0.048	0.076	0.197	0.226	0.294	0.167	0.173	0.167	0.168	0.118	0.086	0.067	0.057	0.046	0.045	0.041	0.125	0.129	0.074	0.053	0.051	0.031	0.018	0.017	0.005	0.006	0.02	0.028	0.035	0.132	0.141	0.106	0.051	0.021	0.004	4
0.1	0.078	0.087	0.087	0.089	0.088	0.09	0.084	0.093	0.09	0.09	0.086	0.088	0.095	0.092	0.089	0.089	0.09	0.087	0.082	0.009	0.025	0.046	0.064	0.082	0.078	0.059	0.043	0.028	0.009	0.009	0.026	0.044	0.061	0.083	0.077	0.063	0.045	0.026	0.008	5
0.084	0.082	0.075	0.083	0.076	0.084	0.079	0.075	0.078	0.077	0.094	0.077	0.074	0.077	0.08	0.076	0.08	0.079	0.079	0.079	0.011	0.027	0.037	0.055	0.068	0.067	0.057	0.041	0.025	0.009	0.009	0.024	0.04	0.052	0.075	0.077	0.058	0.033	0.022	0.007	5
0.199	0.257	0.228	0.231	0.209	0.22	0.225	0.247	0.172	0.182	0.177	0.225	0.196	0.196	0.208	0.249	0.31	0.261	0.194	0.157	0.017	0.06	0.112	0.135	0.173	0.189	0.197	0.136	0.051	0.013	0.023	0.063	0.081	0.148	0.233	0.215	0.159	0.095	0.048	0.019	5
0.211	0.213	0.159	0.117	0.125	0.12	0.114	0.119	0.121	0.131	0.135	0.119	0.132	0.183	0.142	0.144	0.146	0.154	0.147	0.13	0.014	0.037	0.054	0.078	0.126	0.135	0.115	0.084	0.054	0.02	0.017	0.043	0.111	0.104	0.126	0.109	0.082	0.07	0.04	0.012	5
0.235	0.249	0.183	0.14	0.15	0.16	0.133	0.136	0.123	0.139	0.188	0.177	0.135	0.161	0.199	0.174	0.149	0.122	0.148	0.197	0.014	0.043	0.072	0.094	0.142	0.145	0.143	0.085	0.056	0.028	0.032	0.062	0.106	0.121	0.132	0.141	0.105	0.072	0.037	0.014	5
0.151	0.144	0.14	0.139	0.136	0.116	0.139	0.121	0.131	0.112	0.129	0.123	0.124	0.142	0.142	0.137	0.131	0.129	0.13	0.141	0.01	0.031	0.058	0.098	0.119	0.125	0.102	0.068	0.036	0.018	0.018	0.042	0.076	0.084	0.117	0.118	0.093	0.064	0.038	0.015	5
0.19	0.147	0.106	0.119	0.137	0.139	0.127	0.114	0.106	0.11	0.104	0.101	0.119	0.109	0.137	0.144	0.163	0.147	0.142	0.13	0.011	0.03	0.051	0.072	0.107	0.127	0.099	0.078	0.049	0.021	0.012	0.036	0.068	0.098	0.118	0.106	0.098	0.064	0.037	0.01	5
0.097	0.096	0.113	0.11	0.115	0.124	0.144	0.119	0.144	0.148	0.155	0.138	0.12	0.135	0.137	0.134	0.112	0.091	0.092	0.097	0.015	0.035	0.083	0.12	0.116	0.094	0.065	0.042	0.025	0.009	0.013	0.037	0.067	0.086	0.094	0.107	0.093	0.06	0.033	0.013	5
0.131	0.129	0.12	0.141	0.163	0.147	0.144	0.144	0.13	0.127	0.145	0.125	0.134	0.13	0.134	0.147	0.151	0.128	0.131	0.151	0.014	0.04	0.072	0.094	0.118	0.123	0.102	0.069	0.035	0.021	0.015	0.031	0.06	0.101	0.123	0.143	0.097	0.062	0.04	0.015	5
0.101	0.091	0.107	0.095	0.104	0.106	0.118	0.12	0.125	0.114	0.114	0.107	0.097	0.103	0.131	0.107	0.103	0.099	0.103	0.117	0.011	0.042	0.053	0.082	0.087	0.103	0.072	0.049	0.029	0.012	0.011	0.029	0.046	0.068	0.108	0.094	0.083	0.055	0.033	0.013	5
0.25	0.25	0.181	0.208	0.283	0.249	0.201	0.235	0.239	0.284	0.207	0.207	0.21	0.273	0.245	0.271	0.237	0.269	0.225	0.232	0.021	0.071	0.12	0.154	0.229	0.203	0.182	0.121	0.062	0.026	0.017	0.058	0.119	0.185	0.207	0.195	0.16	0.134	0.086	0.024	5
0.106	0.085	0.087	0.081	0.086	0.08	0.078	0.084	0.083	0.083	0.068	0.069	0.089	0.069	0.093	0.125	0.123	0.083	0.073	0.069	0.007	0.023	0.038	0.059	0.072	0.076	0.074	0.047	0.026	0.006	0.007	0.027	0.042	0.061	0.077	0.077	0.062	0.044	0.024	0.006	5
0.095	0.085	0.085	0.088	0.092	0.092	0.087	0.094	0.098	0.087	0.086	0.121	0.123	0.105	0.081	0.087	0.085	0.079	0.067	0.07	0.01	0.038	0.051	0.064	0.078	0.085	0.058	0.036	0.023	0.008	0.01	0.028	0.05	0.067	0.087	0.091	0.057	0.036	0.02	0.007	5
0.129	0.125	0.129	0.121	0.112	0.131	0.137	0.123	0.113	0.12	0.111	0.119	0.125	0.122	0.117	0.122	0.142	0.161	0.115	0.109	0.011	0.033	0.055	0.084	0.116	0.12	0.096	0.061	0.035	0.01	0.013	0.041	0.06	0.086	0.102	0.107	0.092	0.07	0.036	0.012	5
0.089	0.078	0.074	0.075	0.082	0.075	0.069	0.079	0.073	0.068	0.103	0.087	0.074	0.08	0.071	0.081	0.073	0.053	0.072	0.068	0.011	0.026	0.044	0.052	0.065	0.066	0.053	0.034	0.024	0.008	0.01	0.023	0.048	0.061	0.073	0.061	0.05	0.031	0.017	0.007	5
0.066	0.062	0.066	0.077	0.1	0.092	0.07	0.069	0.072	0.075	0.067	0.072	0.066	0.062	0.081	0.094	0.084	0.068	0.074	0.077	0.006	0.019	0.034	0.056	0.067	0.076	0.054	0.033	0.019	0.008	0.008	0.017	0.037	0.049	0.06	0.08	0.051	0.039	0.023	0.008	5
0.107	0.109	0.103	0.115	0.116	0.113	0.109	0.115	0.113	0.097	0.084	0.076	0.073	0.08	0.08	0.097	0.131	0.155	0.185	0.133	0.008	0.025	0.041	0.059	0.09	0.105	0.092	0.071	0.046	0.013	0.01	0.021	0.043	0.058	0.089	0.102	0.099	0.073	0.042	0.01	5
0.098	0.085	0.073	0.07	0.065	0.073	0.072	0.084	0.087	0.078	0.098	0.082	0.083	0.066	0.077	0.077	0.071	0.082	0.074	0.077	0.008	0.034	0.04	0.051	0.066	0.067	0.051	0.042	0.025	0.009	0.009	0.026	0.043	0.05	0.079	0.066	0.051	0.038	0.024	0.007	5
0.198	0.196	0.197	0.173	0.167	0.141	0.154	0.149	0.128	0.138	0.128	0.147	0.206	0.151	0.135	0.116	0.148	0.174	0.226	0.204	0.012	0.035	0.072	0.095	0.138	0.145	0.13	0.097	0.07	0.026	0.017	0.055	0.087	0.103	0.148	0.155	0.113	0.077	0.051	0.017	5
0.109	0.103	0.106	0.105	0.106	0.095	0.109	0.119	0.123	0.104	0.12	0.124	0.139	0.152	0.126	0.112	0.103	0.077	0.065	0.068	0.012	0.034	0.072	0.091	0.109	0.092	0.059	0.042	0.025	0.007	0.016	0.036	0.062	0.079	0.101	0.099	0.076	0.045	0.021	0.005	5
0.101	0.093	0.101	0.094	0.098	0.094	0.103	0.092	0.103	0.104	0.099	0.094	0.074	0.076	0.08	0.107	0.108	0.115	0.119	0.106	0.012	0.026	0.045	0.067	0.083	0.089	0.07	0.052	0.036	0.01	0.008	0.03	0.043	0.058	0.09	0.086	0.071	0.063	0.032	0.009	5
0.086	0.075	0.079	0.077	0.072	0.078	0.11	0.096	0.072	0.086	0.103	0.091	0.089	0.097	0.111	0.086	0.064	0.073	0.067	0.049	0.011	0.025	0.044	0.079	0.073	0.075	0.051	0.031	0.017	0.006	0.009	0.032	0.05	0.057	0.069	0.077	0.055	0.037	0.02	0.006	5
0.066	0.073	0.089	0.112	0.097	0.098	0.097	0.088	0.103	0.105	0.091	0.088	0.096	0.078	0.089	0.092	0.115	0.097	0.08	0.105	0.013	0.035	0.041	0.065	0.086	0.074	0.064	0.052	0.024	0.008	0.007	0.018	0.035	0.055	0.108	0.085	0.064	0.052	0.03	0.009	5
0.089	0.076	0.071	0.076	0.076	0.074	0.083	0.1	0.076	0.087	0.079	0.078	0.093	0.075	0.086	0.072	0.078	0.079	0.08	0.089	0.008	0.029	0.048	0.056	0.066	0.066	0.05	0.045	0.028	0.008	0.007	0.019	0.035	0.063	0.076	0.07	0.062	0.04	0.024	0.009	5
0.07	0.057	0.062	0.059	0.061	0.079	0.108	0.104	0.09	0.077	0.064	0.055	0.057	0.057	0.076	0.088	0.091	0.088	0.091	0.099	0.007	0.017	0.033	0.047	0.078	0.079	0.062	0.034	0.018	0.006	0.007	0.02	0.028	0.039	0.054	0.064	0.066	0.056	0.037	0.01	5
0.079	0.096	0.088	0.085	0.067	0.065	0.063	0.062	0.057	0.057	0.077	0.064	0.078	0.072	0.076	0.083	0.085	0.064	0.057	0.063	0.007	0.019	0.034	0.046	0.058	0.059	0.061	0.049	0.019	0.006	0.007	0.019	0.042	0.08	0.065	0.049	0.042	0.03	0.018	0.005	5
0.045	0.033	0.038	0.036	0.039	0.037	0.031	0.037	0.032	0.037	0.05	0.036	0.034	0.035	0.035	0.037	0.032	0.031	0.035	0.038	0.004	0.011	0.017	0.026	0.034	0.031	0.023	0.018	0.01	0.004	0.006	0.012	0.019	0.026	0.034	0.027	0.025	0.015	0.009	0.005	5
0.051	0.035	0.031	0.038	0.046	0.048	0.038	0.039	0.047	0.039	0.053	0.043	0.057	0.04	0.038	0.034	0.033	0.037	0.038	0.036	0.005	0.015	0.025	0.035	0.034	0.029	0.025	0.019	0.011	0.005	0.006	0.011	0.019	0.034	0.04	0.036	0.025	0.017	0.011	0.004	5
0.047	0.03	0.028	0.029	0.03	0.028	0.031	0.032	0.029	0.028	0.046	0.032	0.031	0.031	0.032	0.038	0.029	0.024	0.023	0.027	0.003	0.01	0.016	0.022	0.028	0.028	0.021	0.013	0.007	0.004	0.007	0.011	0.017	0.02	0.032	0.027	0.015	0.011	0.008	0.004	5
0.063	0.043	0.036	0.029	0.028	0.029	0.03	0.032	0.029	0.03	0.048	0.03	0.028	0.029	0.029	0.033	0.029	0.038	0.044	0.041	0.005	0.01	0.014	0.02	0.025	0.03	0.021	0.019	0.017	0.01	0.008	0.011	0.015	0.021	0.036	0.036	0.019	0.013	0.009	0.002	5
0.07	0.049	0.054	0.049	0.057	0.084	0.063	0.054	0.058	0.064	0.048	0.031	0.037	0.092	0.05	0.175	0.088	0.028	0.033	0.026	0.004	0.009	0.024	0.056	0.066	0.059	0.042	0.023	0.011	0.004	0.006	0.012	0.032	0.042	0.051	0.051	0.053	0.038	0.009	0.002	5
0.046	0.033	0.029	0.029	0.031	0.041	0.041	0.039	0.04	0.054	0.049	0.032	0.036	0.052	0.066	0.032	0.035	0.027	0.03	0.025	0.004	0.013	0.03	0.031	0.035	0.024	0.023	0.014	0.009	0.004	0.005	0.011	0.018	0.023	0.033	0.038	0.032	0.015	0.009	0.002	5
0.374	0.338	0.362	0.396	0.406	0.472	0.56	0.485	0.535	0.541	0.468	0.446	0.483	0.419	0.47	0.424	0.446	0.432	0.411	0.468	0.048	0.182	0.254	0.355	0.393	0.398	0.28	0.183	0.106	0.042	0.036	0.118	0.187	0.289	0.41	0.396	0.331	0.261	0.151	0.058	5
0.45	0.417	0.502	0.475	0.438	0.414	0.455	0.42	0.465	0.454	0.374	0.416	0.46	0.48	0.491	0.466	0.514	0.484	0.407	0.395	0.046	0.127	0.192	0.278	0.48	0.427	0.322	0.221	0.12	0.035	0.052	0.121	0.213	0.323	0.415	0.416	0.299	0.219	0.155	0.041	5
0.354	0.353	0.394	0.411	0.42	0.378	0.333	0.375	0.412	0.493	0.363	0.377	0.392	0.378	0.378	0.444	0.42	0.402	0.367	0.407	0.062	0.144	0.195	0.241	0.34	0.343	0.264	0.207	0.13	0.041	0.029	0.074	0.166	0.304	0.386	0.386	0.28	0.176	0.133	0.039	5
0.371	0.347	0.348	0.361	0.349	0.431	0.414	0.458	0.447	0.441	0.438	0.465	0.402	0.415	0.457	0.359	0.406	0.377	0.317	0.328	0.045	0.134	0.258	0.298	0.369	0.361	0.235	0.172	0.084	0.033	0.048	0.129	0.185	0.266	0.367	0.334	0.3	0.22	0.107	0.037	5
0.246	0.244	0.276	0.324	0.368	0.48	0.406	0.472	0.437	0.404	0.449	0.457	0.435	0.36	0.388	0.299	0.307	0.323	0.325	0.311	0.067	0.169	0.23	0.304	0.297	0.323	0.209	0.134	0.072	0.025	0.024	0.085	0.171	0.262	0.331	0.355	0.298	0.172	0.096	0.035	5
0.303	0.287	0.253	0.216	0.182	0.191	0.215	0.172	0.183	0.218	0.19	0.189	0.252	0.237	0.217	0.201	0.22	0.236	0.244	0.238	0.021	0.048	0.084	0.121	0.204	0.24	0.171	0.118	0.078	0.029	0.022	0.083	0.149	0.154	0.181	0.173	0.138	0.121	0.064	0.029	5
0.432	0.44	0.369	0.306	0.294	0.281	0.313	0.285	0.239	0.251	0.311	0.335	0.371	0.343	0.275	0.316	0.321	0.312	0.327	0.304	0.037	0.086	0.128	0.185	0.271	0.311	0.245	0.187	0.121	0.042	0.046	0.137	0.191	0.209	0.304	0.279	0.227	0.144	0.053	0.022	5
0.439	0.537	0.553	0.497	0.424	0.44	0.388	0.347	0.283	0.27	0.398	0.393	0.398	0.428	0.396	0.408	0.36	0.44	0.481	0.475	0.031	0.086	0.168	0.25	0.34	0.404	0.351	0.261	0.162	0.048	0.061	0.144	0.221	0.308	0.378	0.378	0.303	0.185	0.089	0.03	5
0.255	0.255	0.249	0.265	0.251	0.222	0.241	0.224	0.232	0.203	0.272	0.251	0.261	0.251	0.231	0.227	0.238	0.213	0.217	0.236	0.019	0.059	0.109	0.178	0.249	0.224	0.164	0.11	0.065	0.025	0.033	0.097	0.122	0.184	0.216	0.183	0.15	0.124	0.072	0.023	5
0.263	0.244	0.212	0.221	0.228	0.21	0.186	0.226	0.195	0.209	0.219	0.195	0.239	0.22	0.195	0.228	0.244	0.256	0.196	0.205	0.019	0.062	0.098	0.137	0.214	0.203	0.163	0.104	0.076	0.025	0.025	0.067	0.125	0.163	0.196	0.178	0.138	0.125	0.062	0.019	5
0.282	0.3	0.278	0.265	0.323	0.334	0.28	0.314	0.277	0.352	0.224	0.252	0.265	0.25	0.272	0.234	0.278	0.299	0.435	0.489	0.028	0.083	0.117	0.179	0.268	0.277	0.208	0.174	0.125	0.046	0.019	0.072	0.108	0.179	0.264	0.272	0.239	0.167	0.124	0.058	5
0.075	0.114	0.146	0.112	0.058	0.054	0.056	0.051	0.053	0.053	0.069	0.082	0.087	0.083	0.063	0.076	0.133	0.07	0.058	0.053	0.006	0.015	0.031	0.044	0.063	0.076	0.064	0.055	0.019	0.009	0.008	0.022	0.052	0.077	0.091	0.05	0.035	0.032	0.015	0.003	5
0.093	0.094	0.085	0.064	0.06	0.061	0.061	0.065	0.064	0.065	0.058	0.042	0.034	0.036	0.056	0.266	0.067	0.05	0.06	0.055	0.005	0.014	0.026	0.05	0.061	0.057	0.055	0.043	0.029	0.013	0.006	0.016	0.027	0.051	0.08	0.075	0.051	0.033	0.012	0.004	5
0.055	0.041	0.037	0.044	0.046	0.055	0.05	0.053	0.057	0.051	0.05	0.043	0.042	0.044	0.057	0.048	0.05	0.054	0.052	0.048	0.007	0.014	0.022	0.037	0.04	0.049	0.034	0.022	0.013	0.005	0.005	0.013	0.023	0.027	0.04	0.048	0.038	0.027	0.016	0.006	5
0.064	0.102	0.082	0.088	0.087	0.086	0.068	0.049	0.078	0.064	0.047	0.043	0.093	0.054	0.08	0.09	0.151	0.072	0.071	0.072	0.004	0.014	0.029	0.042	0.073	0.08	0.056	0.059	0.016	0.007	0.005	0.018	0.044	0.054	0.06	0.067	0.071	0.038	0.019	0.005	5
0.145	0.102	0.066	0.071	0.073	0.085	0.082	0.101	0.085	0.103	0.09	0.07	0.081	0.089	0.094	0.105	0.108	0.102	0.106	0.074	0.015	0.033	0.043	0.051	0.062	0.069	0.083	0.052	0.032	0.015	0.009	0.023	0.048	0.064	0.069	0.087	0.088	0.048	0.019	0.003	5
0.076	0.066	0.054	0.048	0.048	0.059	0.056	0.045	0.047	0.041	0.077	0.059	0.047	0.043	0.044	0.046	0.056	0.061	0.058	0.049	0.004	0.015	0.034	0.024	0.047	0.046	0.04	0.029	0.017	0.009	0.01	0.022	0.024	0.046	0.04	0.047	0.041	0.022	0.011	0.004	5
0.071	0.057	0.063	0.076	0.078	0.085	0.064	0.052	0.062	0.103	0.07	0.053	0.049	0.059	0.165	0.135	0.043	0.045	0.045	0.052	0.008	0.019	0.048	0.053	0.067	0.058	0.043	0.038	0.013	0.006	0.007	0.014	0.034	0.053	0.066	0.067	0.055	0.042	0.011	0.004	5
0.062	0.051	0.047	0.087	0.085	0.095	0.081	0.094	0.074	0.052	0.051	0.039	0.115	0.04	0.058	0.069	0.147	0.075	0.057	0.073	0.004	0.012	0.021	0.064	0.077	0.071	0.066	0.024	0.014	0.006	0.006	0.021	0.025	0.05	0.051	0.073	0.053	0.054	0.022	0.006	5
0.056	0.051	0.048	0.049	0.051	0.047	0.046	0.041	0.038	0.039	0.049	0.042	0.045	0.044	0.045	0.037	0.052	0.045	0.044	0.06	0.005	0.013	0.021	0.031	0.035	0.037	0.038	0.025	0.017	0.008	0.005	0.014	0.02	0.027	0.051	0.05	0.029	0.017	0.011	0.006	5
0.389	0.392	0.366	0.385	0.403	0.439	0.415	0.39	0.38	0.365	0.398	0.406	0.393	0.399	0.408	0.38	0.406	0.375	0.369	0.38	0.042	0.115	0.221	0.278	0.342	0.332	0.273	0.194	0.121	0.043	0.034	0.108	0.201	0.279	0.375	0.368	0.287	0.168	0.106	0.035	5
0.389	0.389	0.383	0.41	0.344	0.365	0.326	0.389	0.44	0.411	0.391	0.375	0.361	0.334	0.353	0.398	0.391	0.392	0.413	0.45	0.043	0.117	0.184	0.26	0.348	0.341	0.265	0.208	0.13	0.04	0.052	0.111	0.183	0.245	0.32	0.34	0.296	0.208	0.133	0.045	5
0.588	0.561	0.568	0.572	0.573	0.505	0.574	0.506	0.499	0.465	0.477	0.517	0.552	0.546	0.543	0.571	0.569	0.572	0.572	0.502	0.047	0.136	0.256	0.375	0.465	0.506	0.41	0.293	0.17	0.063	0.05	0.157	0.278	0.408	0.509	0.475	0.378	0.265	0.154	0.046	5
0.427	0.444	0.387	0.367	0.372	0.382	0.427	0.431	0.455	0.537	0.414	0.446	0.403	0.463	0.388	0.406	0.491	0.439	0.381	0.402	0.048	0.166	0.25	0.292	0.327	0.347	0.31	0.214	0.122	0.045	0.039	0.113	0.203	0.285	0.391	0.39	0.306	0.234	0.126	0.038	5
0.439	0.426	0.386	0.401	0.351	0.387	0.361	0.336	0.355	0.339	0.411	0.393	0.395	0.414	0.41	0.355	0.378	0.313	0.351	0.363	0.036	0.116	0.186	0.252	0.353	0.335	0.279	0.19	0.106	0.048	0.042	0.139	0.223	0.28	0.333	0.336	0.251	0.169	0.087	0.035	5
0.413	0.366	0.428	0.394	0.392	0.395	0.447	0.369	0.395	0.423	0.363	0.399	0.488	0.426	0.4	0.383	0.359	0.386	0.44	0.378	0.041	0.115	0.237	0.269	0.36	0.326	0.318	0.192	0.12	0.036	0.045	0.122	0.201	0.262	0.375	0.375	0.284	0.211	0.105	0.04	5
0.464	0.383	0.386	0.393	0.324	0.326	0.359	0.336	0.375	0.38	0.398	0.434	0.435	0.373	0.363	0.37	0.339	0.338	0.321	0.35	0.044	0.137	0.177	0.26	0.326	0.33	0.255	0.187	0.11	0.042	0.045	0.133	0.222	0.258	0.361	0.328	0.228	0.163	0.09	0.041	5
0.429	0.431	0.414	0.359	0.336	0.426	0.412	0.407	0.439	0.367	0.479	0.458	0.392	0.34	0.38	0.444	0.413	0.355	0.4	0.368	0.032	0.125	0.238	0.277	0.367	0.354	0.264	0.188	0.126	0.038	0.049	0.159	0.209	0.247	0.368	0.354	0.286	0.199	0.102	0.042	5
0.29	0.277	0.297	0.332	0.313	0.281	0.291	0.303	0.326	0.336	0.333	0.296	0.303	0.283	0.309	0.318	0.286	0.31	0.284	0.323	0.03	0.095	0.155	0.229	0.253	0.293	0.209	0.159	0.078	0.025	0.043	0.097	0.143	0.198	0.247	0.274	0.23	0.168	0.092	0.033	5
0.412	0.357	0.329	0.327	0.337	0.351	0.325	0.334	0.299	0.288	0.328	0.324	0.339	0.325	0.295	0.304	0.379	0.363	0.346	0.36	0.029	0.089	0.162	0.212	0.309	0.296	0.236	0.17	0.134	0.047	0.035	0.103	0.165	0.265	0.311	0.279	0.217	0.198	0.087	0.026	5
0.1	0.065	0.086	0.09	0.094	0.087	0.078	0.082	0.085	0.1	0.098	0.084	0.081	0.082	0.085	0.072	0.088	0.081	0.079	0.115	0.009	0.023	0.047	0.064	0.072	0.077	0.059	0.045	0.026	0.011	0.01	0.025	0.047	0.056	0.069	0.075	0.063	0.042	0.031	0.014	5
0.15	0.118	0.112	0.095	0.109	0.11	0.118	0.105	0.098	0.103	0.132	0.099	0.111	0.112	0.094	0.106	0.124	0.106	0.112	0.119	0.02	0.024	0.043	0.075	0.097	0.105	0.088	0.058	0.036	0.013	0.018	0.046	0.048	0.07	0.116	0.093	0.069	0.054	0.034	0.01	5
0.097	0.098	0.126	0.107	0.116	0.125	0.127	0.143	0.124	0.112	0.136	0.109	0.096	0.094	0.097	0.116	0.139	0.165	0.125	0.096	0.013	0.031	0.057	0.094	0.106	0.106	0.077	0.057	0.036	0.009	0.012	0.03	0.055	0.076	0.093	0.098	0.098	0.077	0.036	0.009	5
0.099	0.112	0.091	0.08	0.089	0.083	0.09	0.109	0.14	0.111	0.118	0.084	0.066	0.081	0.076	0.128	0.117	0.092	0.105	0.138	0.013	0.035	0.041	0.069	0.084	0.09	0.065	0.05	0.037	0.015	0.01	0.025	0.043	0.062	0.079	0.094	0.071	0.065	0.037	0.014	5
0.156	0.133	0.139	0.136	0.15	0.196	0.2	0.181	0.19	0.211	0.245	0.183	0.175	0.162	0.156	0.176	0.158	0.139	0.134	0.163	0.035	0.068	0.115	0.128	0.132	0.125	0.119	0.065	0.04	0.017	0.014	0.038	0.089	0.129	0.166	0.143	0.118	0.09	0.043	0.018	5
0.138	0.112	0.138	0.117	0.12	0.122	0.132	0.103	0.198	0.14	0.253	0.155	0.124	0.106	0.09	0.094	0.106	0.109	0.105	0.169	0.024	0.06	0.079	0.094	0.118	0.108	0.064	0.049	0.051	0.015	0.024	0.051	0.07	0.086	0.105	0.12	0.09	0.06	0.037	0.019	5
0.448	0.444	0.432	0.377	0.346	0.313	0.29	0.335	0.414	0.475	0.353	0.377	0.354	0.422	0.397	0.394	0.359	0.42	0.372	0.438	0.044	0.128	0.174	0.242	0.336	0.339	0.287	0.219	0.134	0.046	0.044	0.1	0.222	0.284	0.339	0.323	0.265	0.204	0.117	0.052	5
0.39	0.402	0.422	0.334	0.367	0.368	0.39	0.343	0.405	0.473	0.407	0.351	0.366	0.382	0.417	0.403	0.419	0.379	0.361	0.402	0.045	0.12	0.194	0.289	0.359	0.321	0.269	0.185	0.131	0.042	0.043	0.108	0.196	0.273	0.344	0.347	0.274	0.204	0.121	0.045	5
0.115	0.108	0.131	0.154	0.155	0.108	0.079	0.105	0.112	0.129	0.103	0.079	0.104	0.138	0.146	0.116	0.112	0.115	0.151	0.129	0.015	0.033	0.056	0.069	0.095	0.112	0.089	0.071	0.044	0.013	0.011	0.024	0.048	0.088	0.106	0.124	0.103	0.054	0.028	0.012	5
0.129	0.098	0.092	0.129	0.11	0.096	0.086	0.08	0.066	0.073	0.081	0.079	0.082	0.096	0.092	0.09	0.108	0.097	0.113	0.119	0.008	0.023	0.042	0.049	0.081	0.081	0.067	0.055	0.047	0.023	0.009	0.02	0.036	0.071	0.112	0.108	0.062	0.027	0.021	0.011	5
0.14	0.117	0.115	0.109	0.112	0.115	0.125	0.149	0.102	0.074	0.121	0.146	0.138	0.102	0.123	0.097	0.098	0.112	0.11	0.112	0.01	0.037	0.058	0.088	0.09	0.103	0.087	0.055	0.032	0.014	0.013	0.035	0.06	0.103	0.12	0.087	0.066	0.048	0.035	0.009	5
0.208	0.186	0.194	0.17	0.158	0.202	0.178	0.178	0.187	0.206	0.192	0.169	0.164	0.164	0.216	0.197	0.181	0.191	0.179	0.212	0.02	0.05	0.096	0.128	0.165	0.15	0.15	0.091	0.059	0.023	0.025	0.05	0.097	0.128	0.147	0.17	0.134	0.109	0.054	0.02	5
0.332	0.312	0.275	0.227	0.308	0.301	0.246	0.263	0.238	0.247	0.264	0.24	0.258	0.253	0.211	0.209	0.254	0.325	0.363	0.37	0.032	0.088	0.118	0.154	0.208	0.225	0.199	0.173	0.124	0.051	0.022	0.064	0.129	0.199	0.26	0.246	0.212	0.138	0.082	0.023	5
0.297	0.299	0.282	0.235	0.25	0.27	0.255	0.262	0.259	0.311	0.289	0.25	0.277	0.245	0.269	0.238	0.259	0.241	0.272	0.377	0.035	0.083	0.123	0.185	0.232	0.238	0.186	0.155	0.087	0.036	0.038	0.09	0.129	0.16	0.227	0.26	0.185	0.148	0.093	0.031	5
0.318	0.258	0.252	0.222	0.254	0.265	0.223	0.228	0.239	0.292	0.32	0.291	0.285	0.261	0.233	0.209	0.184	0.214	0.287	0.267	0.032	0.086	0.141	0.158	0.238	0.225	0.186	0.108	0.064	0.04	0.033	0.103	0.162	0.164	0.205	0.213	0.161	0.126	0.084	0.025	5
0.332	0.297	0.321	0.301	0.302	0.296	0.316	0.355	0.353	0.376	0.337	0.311	0.292	0.312	0.318	0.314	0.329	0.3	0.343	0.388	0.039	0.117	0.154	0.235	0.275	0.283	0.232	0.151	0.095	0.05	0.034	0.087	0.148	0.217	0.27	0.319	0.228	0.173	0.117	0.037	5
0.379	0.303	0.28	0.333	0.279	0.282	0.301	0.323	0.346	0.365	0.381	0.343	0.306	0.281	0.303	0.317	0.319	0.324	0.298	0.321	0.041	0.122	0.149	0.209	0.3	0.294	0.227	0.142	0.089	0.037	0.071	0.095	0.141	0.21	0.292	0.268	0.238	0.156	0.104	0.033	5
0.178	0.157	0.161	0.169	0.187	0.186	0.186	0.197	0.213	0.214	0.175	0.145	0.164	0.191	0.17	0.203	0.185	0.182	0.225	0.203	0.02	0.053	0.1	0.132	0.159	0.163	0.128	0.089	0.055	0.023	0.019	0.041	0.075	0.116	0.159	0.173	0.146	0.107	0.062	0.026	5
0.682	0.686	0.636	0.669	0.726	0.759	0.7	0.722	0.774	0.762	0.701	0.74	0.755	0.74	0.708	0.713	0.728	0.695	0.684	0.651	0.075	0.209	0.384	0.535	0.697	0.648	0.433	0.33	0.192	0.067	0.071	0.231	0.337	0.504	0.609	0.649	0.502	0.366	0.221	0.077	5
0.158	0.146	0.14	0.139	0.124	0.123	0.132	0.149	0.134	0.154	0.162	0.134	0.155	0.148	0.139	0.147	0.144	0.131	0.115	0.128	0.015	0.054	0.075	0.094	0.118	0.13	0.092	0.062	0.047	0.014	0.017	0.051	0.066	0.096	0.134	0.116	0.106	0.065	0.037	0.01	5
0.201	0.223	0.236	0.226	0.185	0.27	0.239	0.207	0.179	0.278	0.231	0.234	0.214	0.223	0.183	0.264	0.204	0.254	0.231	0.2	0.021	0.073	0.096	0.153	0.229	0.214	0.162	0.11	0.048	0.017	0.03	0.062	0.083	0.204	0.201	0.171	0.135	0.116	0.082	0.033	5
0.408	0.354	0.309	0.363	0.308	0.272	0.282	0.277	0.386	0.378	0.412	0.322	0.344	0.298	0.281	0.275	0.317	0.38	0.375	0.341	0.051	0.11	0.164	0.237	0.295	0.248	0.208	0.17	0.138	0.049	0.031	0.111	0.157	0.262	0.303	0.287	0.214	0.17	0.106	0.03	5
0.251	0.225	0.24	0.251	0.24	0.183	0.271	0.263	0.196	0.187	0.286	0.238	0.226	0.229	0.208	0.234	0.191	0.265	0.206	0.228	0.023	0.073	0.125	0.131	0.218	0.22	0.152	0.126	0.065	0.023	0.032	0.078	0.12	0.151	0.219	0.23	0.149	0.092	0.068	0.023	5
0.427	0.436	0.433	0.422	0.428	0.463	0.432	0.444	0.455	0.452	0.439	0.457	0.386	0.381	0.446	0.426	0.484	0.478	0.448	0.449	0.047	0.133	0.208	0.316	0.417	0.373	0.296	0.214	0.152	0.049	0.033	0.123	0.208	0.318	0.408	0.398	0.3	0.232	0.133	0.055	5
0.419	0.447	0.402	0.445	0.467	0.432	0.415	0.403	0.379	0.431	0.402	0.372	0.408	0.382	0.353	0.393	0.441	0.482	0.51	0.504	0.041	0.115	0.194	0.295	0.359	0.336	0.336	0.25	0.151	0.049	0.034	0.106	0.207	0.315	0.362	0.359	0.325	0.236	0.142	0.042	5
0.456	0.413	0.45	0.47	0.429	0.422	0.416	0.376	0.413	0.429	0.41	0.375	0.42	0.373	0.359	0.414	0.445	0.478	0.52	0.481	0.046	0.118	0.182	0.297	0.378	0.336	0.324	0.25	0.166	0.052	0.036	0.118	0.215	0.297	0.35	0.401	0.32	0.24	0.133	0.042	5
0.323	0.312	0.343	0.365	0.386	0.335	0.356	0.37	0.323	0.317	0.34	0.333	0.364	0.363	0.394	0.386	0.337	0.305	0.302	0.305	0.021	0.1	0.178	0.245	0.352	0.32	0.244	0.143	0.082	0.031	0.037	0.11	0.175	0.262	0.285	0.302	0.235	0.184	0.092	0.033	5
0.115	0.119	0.113	0.104	0.105	0.111	0.109	0.112	0.114	0.11	0.056	0.414	0.139	0.045	0.05	0.181	0.115	0.047	0.04	0.043	0.011	0.062	0.07	0.094	0.104	0.096	0.057	0.042	0.014	0.005	0.011	0.055	0.073	0.109	0.104	0.094	0.053	0.04	0.014	0.003	5
0.187	0.153	0.099	0.077	0.069	0.06	0.067	0.055	0.071	0.063	0.077	0.059	0.045	0.048	0.076	0.076	0.124	0.172	0.121	0.105	0.006	0.016	0.025	0.038	0.06	0.066	0.064	0.082	0.065	0.024	0.011	0.023	0.035	0.073	0.105	0.074	0.058	0.038	0.022	0.009	5
0.191	0.157	0.101	0.08	0.068	0.063	0.066	0.057	0.074	0.064	0.079	0.055	0.047	0.051	0.078	0.083	0.137	0.168	0.11	0.109	0.006	0.015	0.026	0.039	0.063	0.067	0.065	0.088	0.061	0.026	0.011	0.024	0.036	0.077	0.103	0.077	0.06	0.038	0.023	0.008	5
0.05	0.033	0.039	0.037	0.071	0.109	0.131	0.144	0.137	0.104	0.062	0.061	0.076	0.086	0.096	0.108	0.078	0.075	0.103	0.115	0.011	0.032	0.056	0.069	0.068	0.078	0.066	0.031	0.011	0.004	0.006	0.012	0.02	0.028	0.044	0.106	0.093	0.067	0.038	0.011	5
0.055	0.032	0.033	0.038	0.04	0.079	0.109	0.128	0.14	0.126	0.056	0.044	0.067	0.077	0.082	0.098	0.091	0.068	0.086	0.113	0.008	0.029	0.05	0.066	0.066	0.073	0.056	0.024	0.011	0.005	0.006	0.014	0.017	0.025	0.038	0.061	0.102	0.073	0.035	0.016	5
0.162	0.096	0.078	0.073	0.073	0.07	0.075	0.079	0.083	0.097	0.082	0.123	0.063	0.082	0.095	0.046	0.049	0.106	0.157	0.081	0.011	0.028	0.036	0.046	0.077	0.084	0.062	0.036	0.035	0.027	0.017	0.033	0.04	0.049	0.082	0.084	0.059	0.04	0.03	0.008	5
0.161	0.151	0.085	0.074	0.074	0.071	0.071	0.075	0.081	0.087	0.093	0.12	0.077	0.099	0.091	0.05	0.049	0.141	0.127	0.088	0.009	0.025	0.034	0.05	0.08	0.087	0.073	0.042	0.045	0.02	0.018	0.054	0.045	0.051	0.078	0.09	0.056	0.038	0.03	0.007	5
0.096	0.075	0.064	0.066	0.067	0.066	0.065	0.067	0.061	0.073	0.082	0.167	0.149	0.047	0.039	0.042	0.042	0.04	0.038	0.05	0.009	0.038	0.049	0.054	0.061	0.06	0.031	0.023	0.016	0.007	0.014	0.04	0.05	0.056	0.064	0.057	0.034	0.019	0.011	0.004	5
0.21	0.163	0.178	0.18	0.165	0.171	0.14	0.129	0.13	0.126	0.109	0.105	0.131	0.15	0.143	0.172	0.196	0.213	0.237	0.144	0.008	0.034	0.07	0.095	0.122	0.116	0.12	0.122	0.088	0.019	0.01	0.029	0.059	0.125	0.18	0.142	0.12	0.084	0.038	0.009	5
0.059	0.055	0.042	0.034	0.039	0.038	0.043	0.06	0.038	0.058	0.049	0.031	0.05	0.046	0.045	0.044	0.052	0.043	0.053	0.054	0.007	0.015	0.015	0.025	0.042	0.051	0.035	0.023	0.014	0.005	0.005	0.014	0.028	0.032	0.032	0.031	0.038	0.026	0.019	0.007	5
0.114	0.119	0.095	0.096	0.091	0.108	0.11	0.094	0.086	0.092	0.115	0.102	0.102	0.102	0.105	0.087	0.104	0.096	0.089	0.099	0.014	0.036	0.053	0.066	0.074	0.074	0.077	0.062	0.034	0.009	0.01	0.024	0.054	0.088	0.101	0.087	0.059	0.047	0.024	0.007	5
